# Supplementary material for: Benzofuran and indole synthesis via Cu(i)-catalyzed coupling of N-tosylhydrazone and o-hydroxy or o-amino phenylacetylene
Source: Royal Society of Chemistry journal article supplement (doi:10.1039/c2ob26867a), 2012-10-30

## *Supporting Information*

# **Benzofuran and Indole Synthesis *via* Cu(I)-catalyzed Coupling of *N*-Tosylhydrazone and *o*-Hydroxy or *o*-Amino Phenylacetylene**

Tiebo Xiao,<sup>a</sup> Xichang Dong<sup>a</sup> and Lei Zhou<sup>\*,a,b</sup>

<sup>a</sup>: School of Chemistry and Chemical Engineering, Sun Yat-Sen University, 135

Xingang West Road, Guangzhou 510275, China. E-mail: [zhoul39@mail.sysu.edu.cn](mailto:zhoul39@mail.sysu.edu.cn),

<sup>b</sup>: Beijing National Laboratory of Molecular Sciences (BNLMS), College of Chemistry,

Peking University, Beijing 100871, China

### **General details**

All reactions were performed under a nitrogen atmosphere in a 10 mL Schlenk tube. MeCN was dried over CaH<sub>2</sub> and toluene was dried over Na before use. For chromatography, 200-300 mesh silica gel (Qingdao, China) was employed. <sup>1</sup>H NMR and <sup>13</sup>CNMR spectra were recorded on Varian 300 spectrometer in CDCl<sub>3</sub> solution. Mass spectra were obtained on Micromass ZAB-HS Magnetic mass spectrometer or ZAB-HS Double Focusing Mass Spectrometer, and HRMS were performed at analytical center of Sun Yat-Sen University on Thermo MAT95XP mass spectrometer or Peking University on Bruck APEX IV mass spectrometer. The IR spectra were measured on a Nicolet/Nexus 670 FT-IR spectrometer. Unless otherwise noted, materials obtained from commercial suppliers were used without further purification. **2a**,<sup>1</sup> **2b**<sup>2</sup> and **2c**<sup>3</sup> were prepared by literature procedures.

## Reference

- 1 G. W. Kabalka, L.-L. Zhou, L. Wang and R. M. Pagni, *Tetrahedron* **2006**, *62*, 857.
- 2 Z. Chen, D. Zheng and J. Wu, *Org. Lett.* **2011**, *13*, 848.
- 3 Y. Yin, W. Ma, Z. Chai and G. Zhao, *J. Org. Chem.* **2007**, *72*, 5731.

# $^1\text{H}$ and $^{13}\text{C}$ NMR Spectra

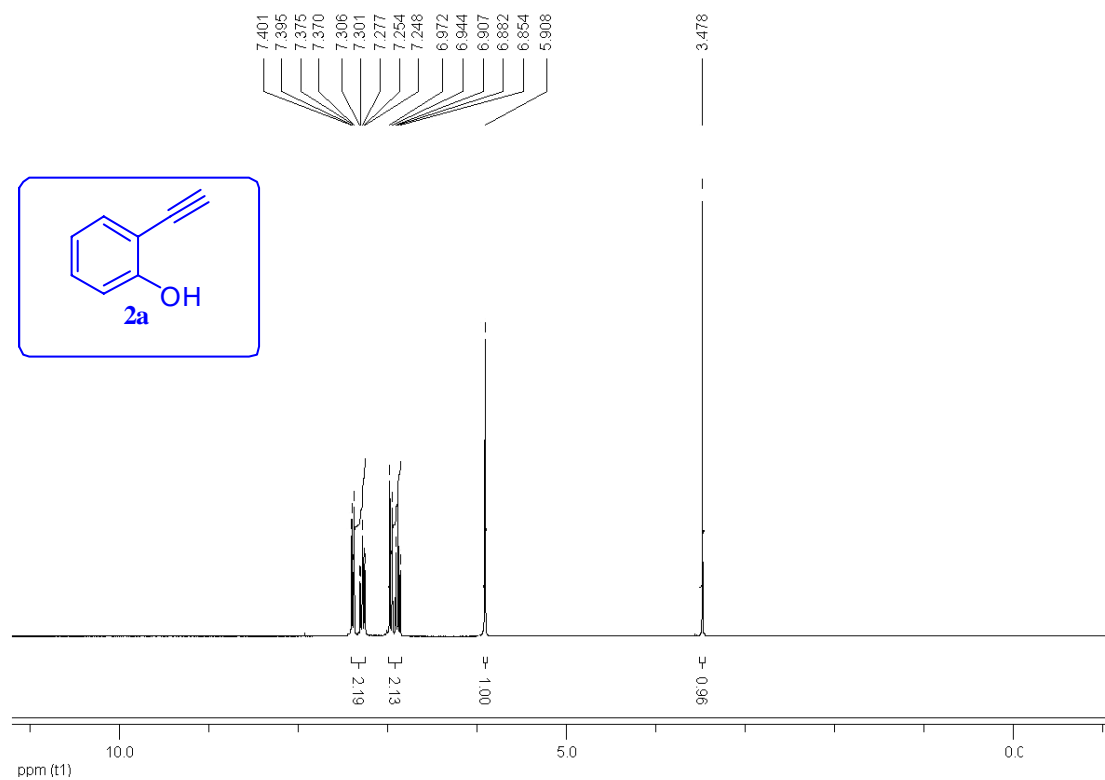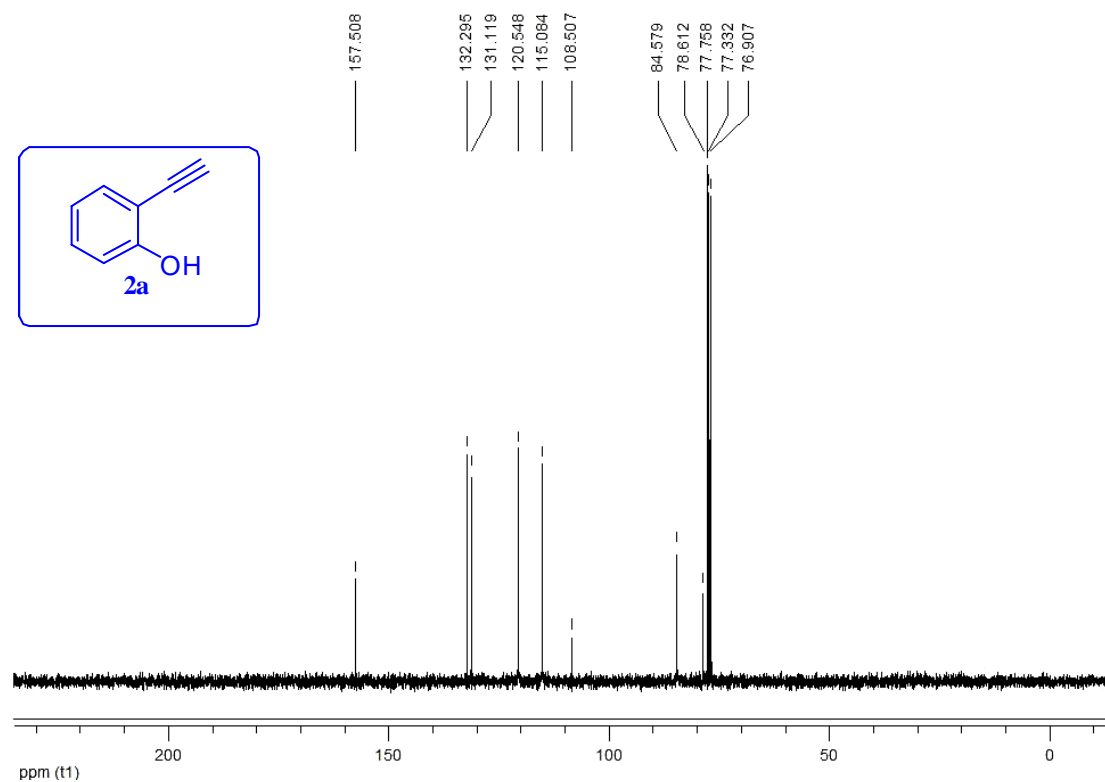

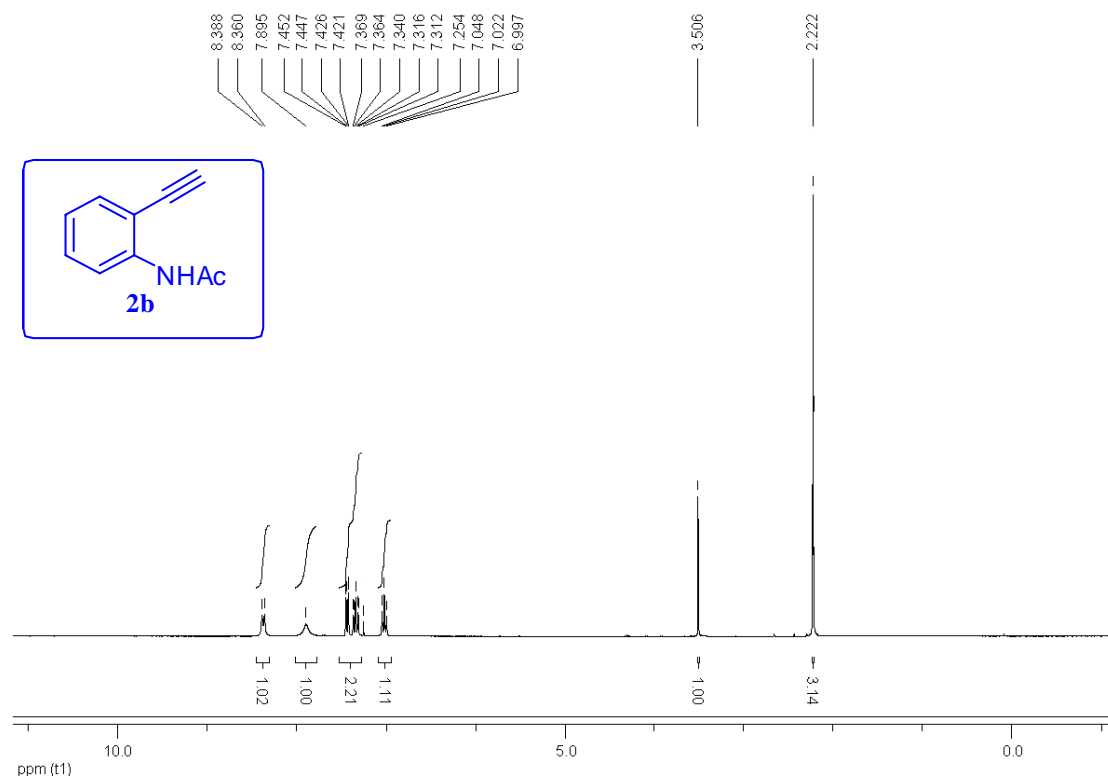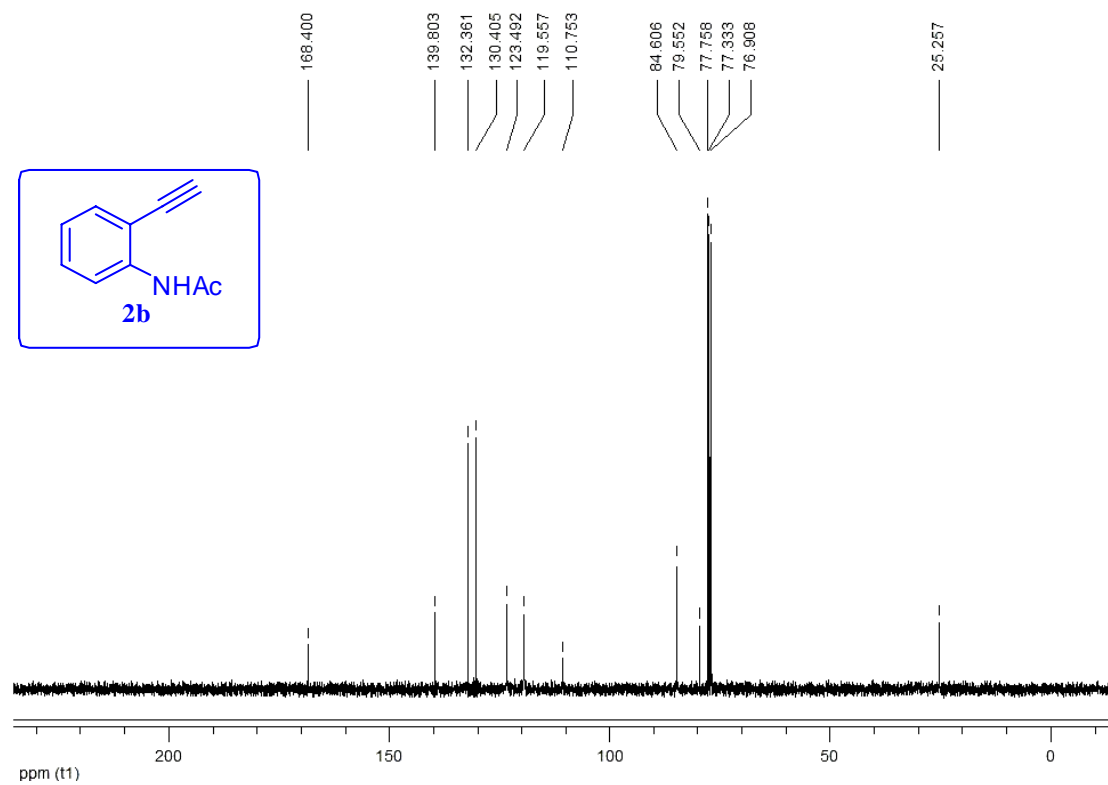

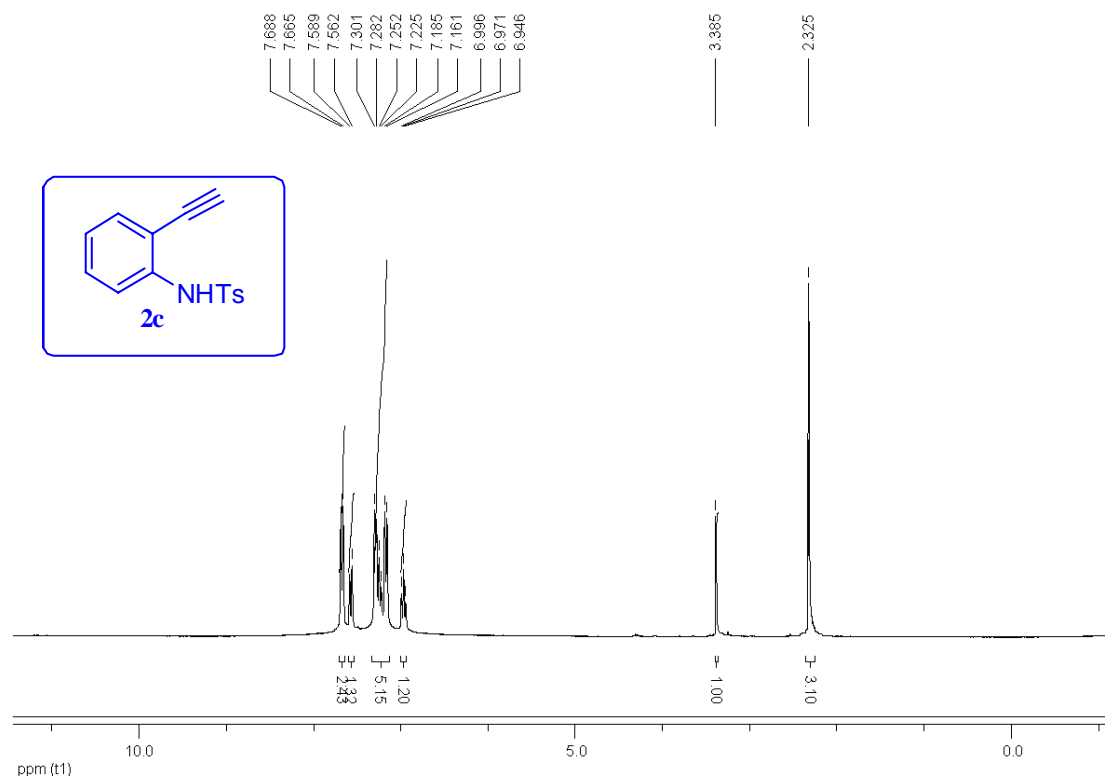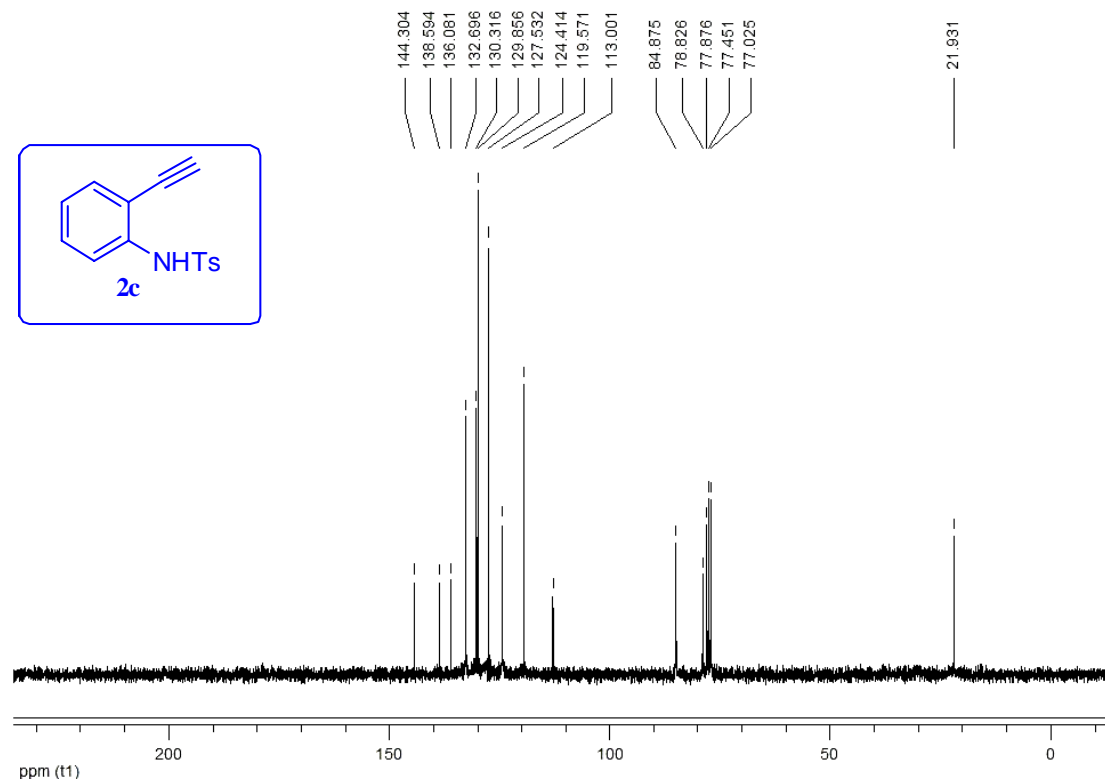

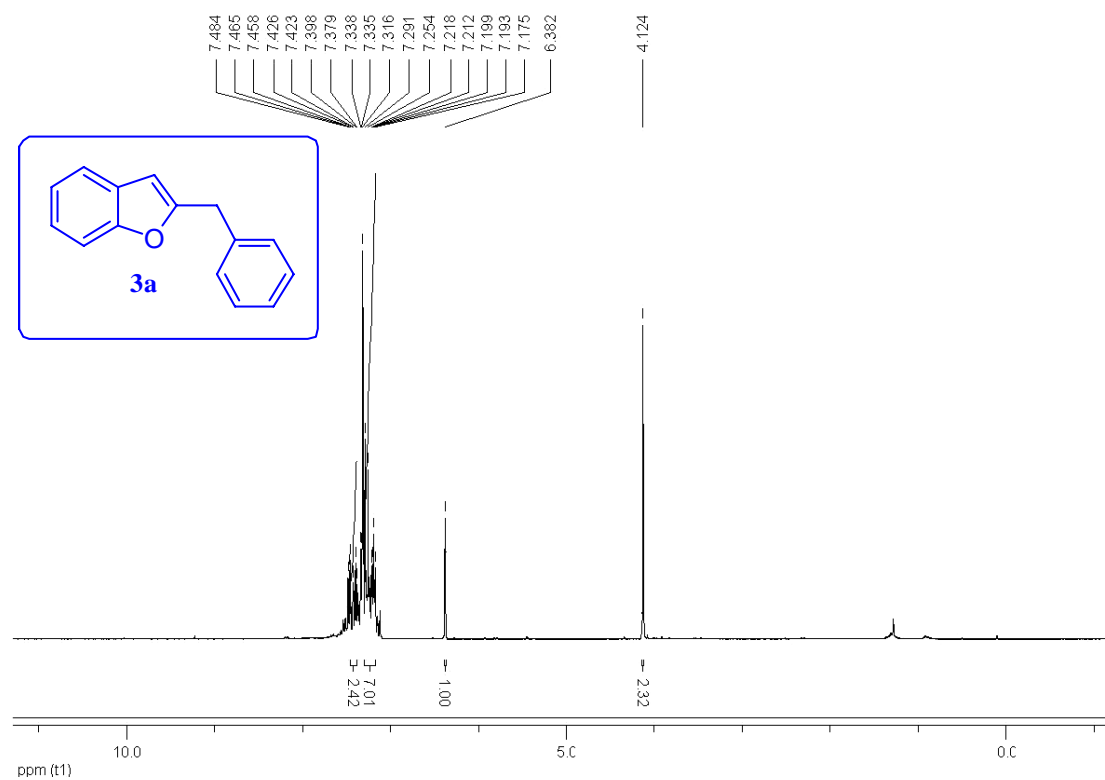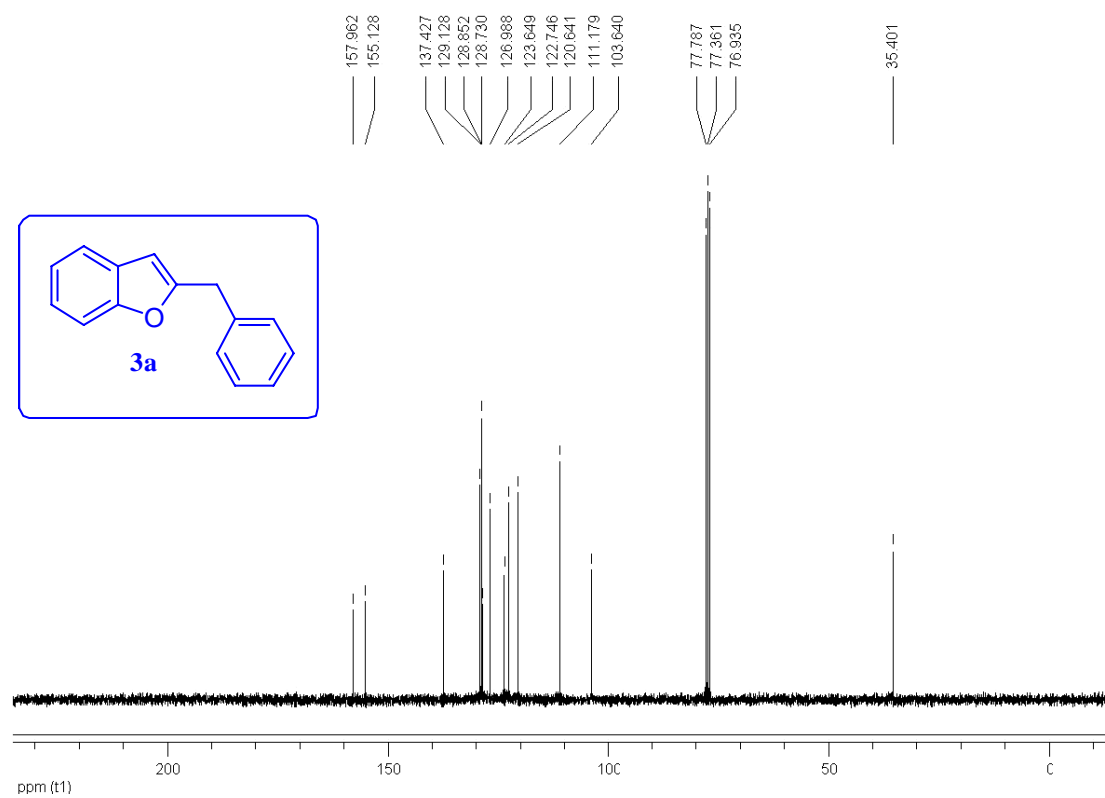

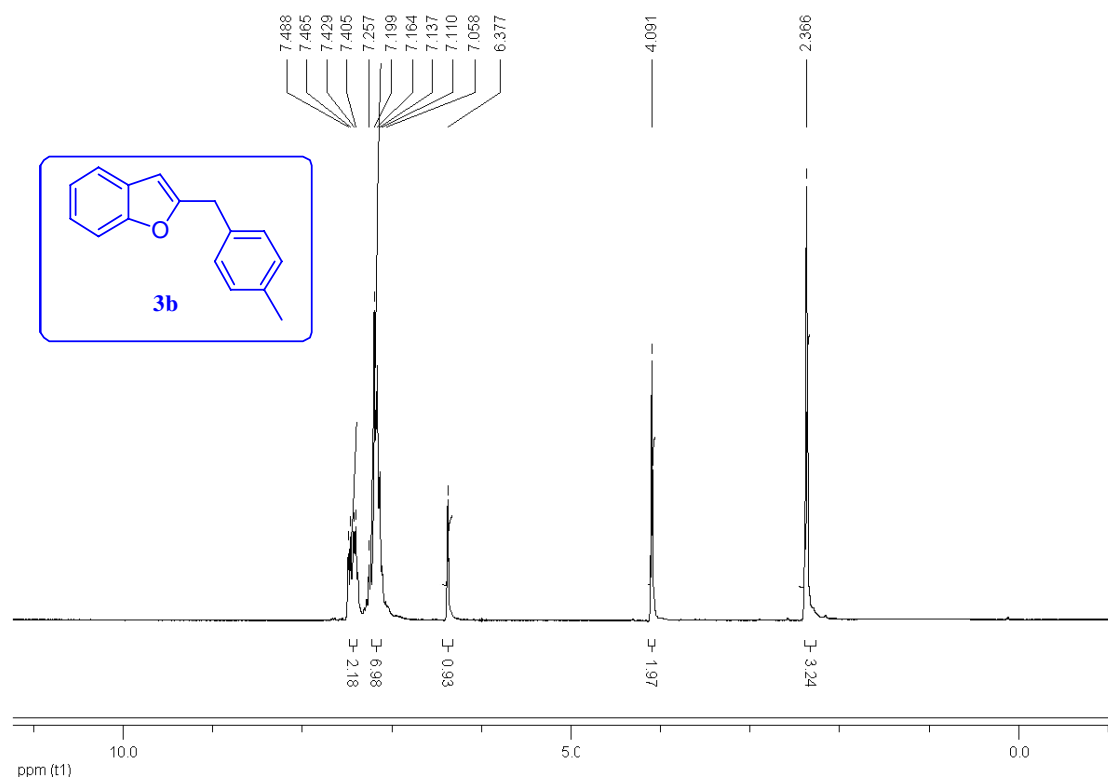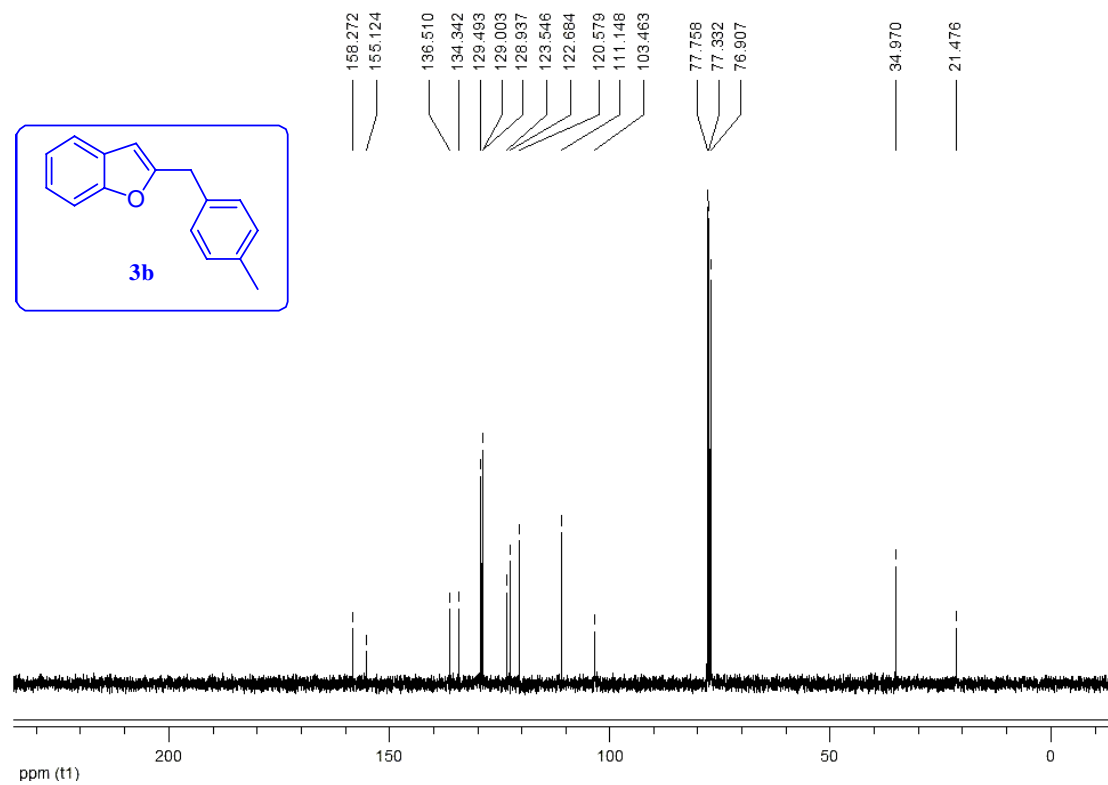

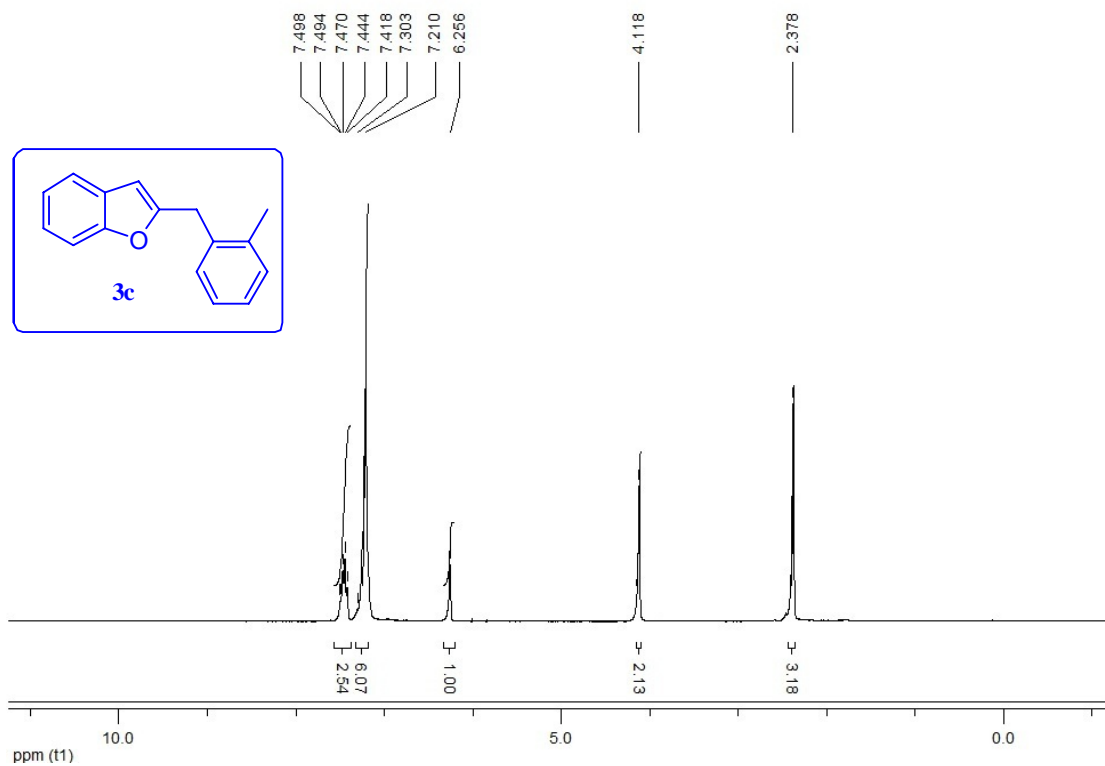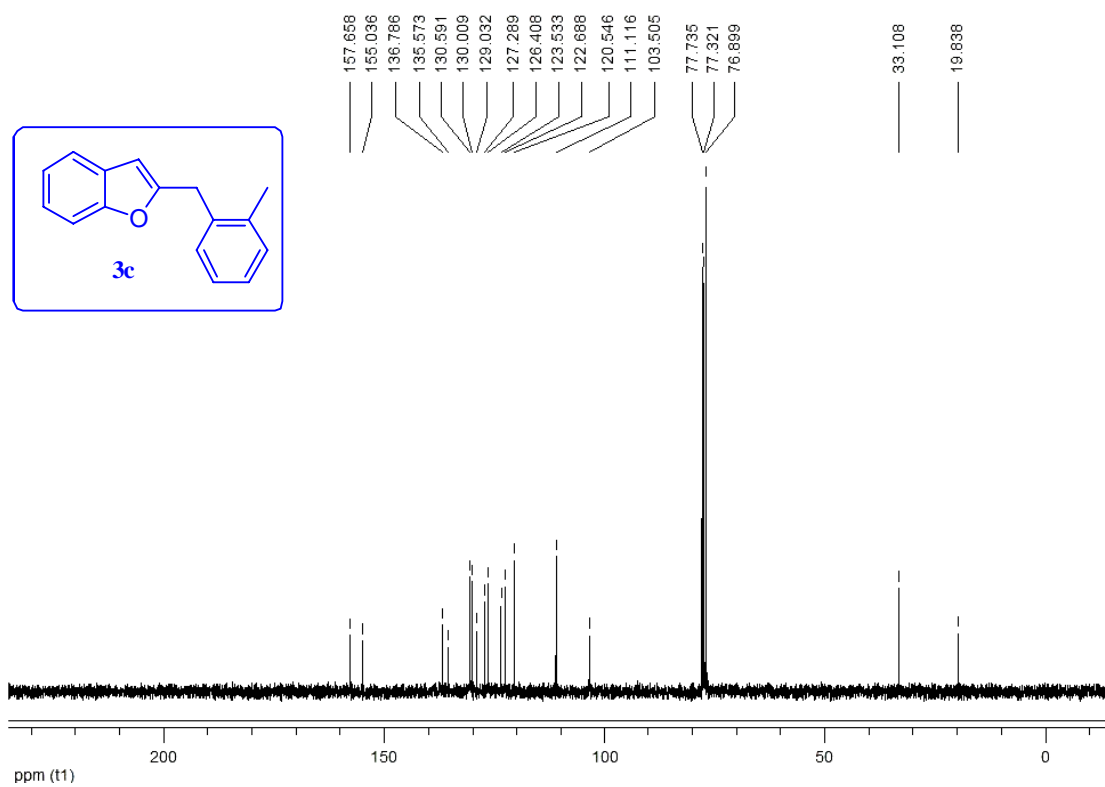



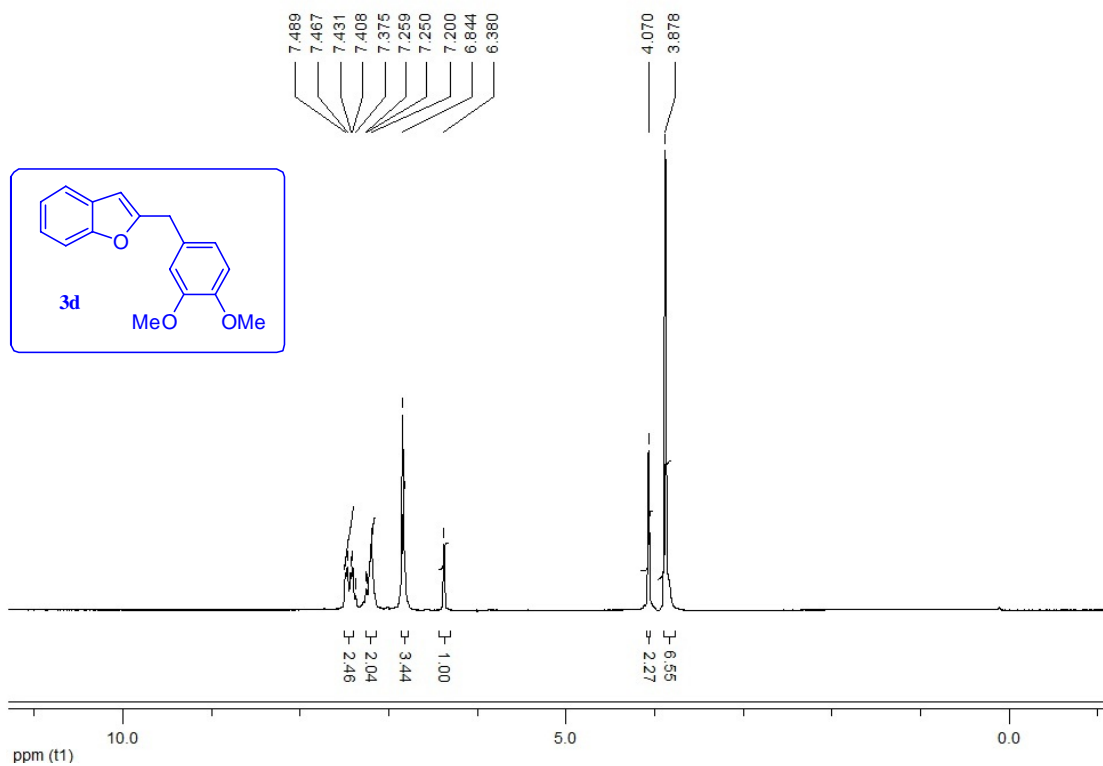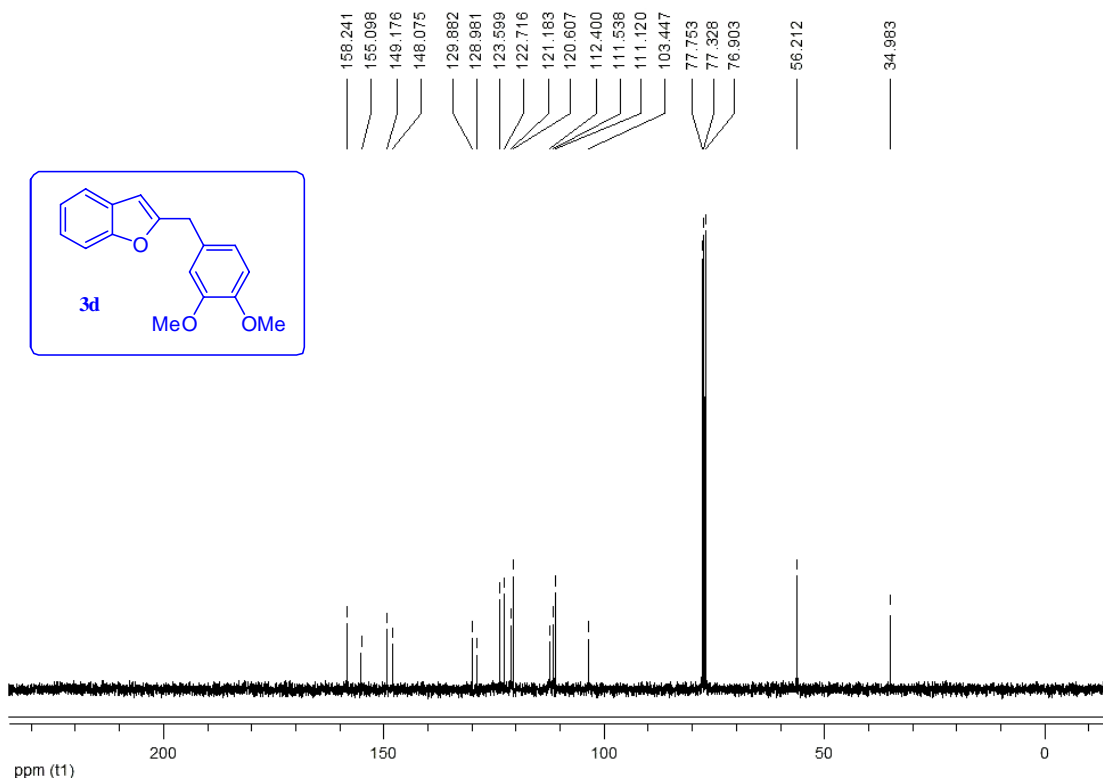

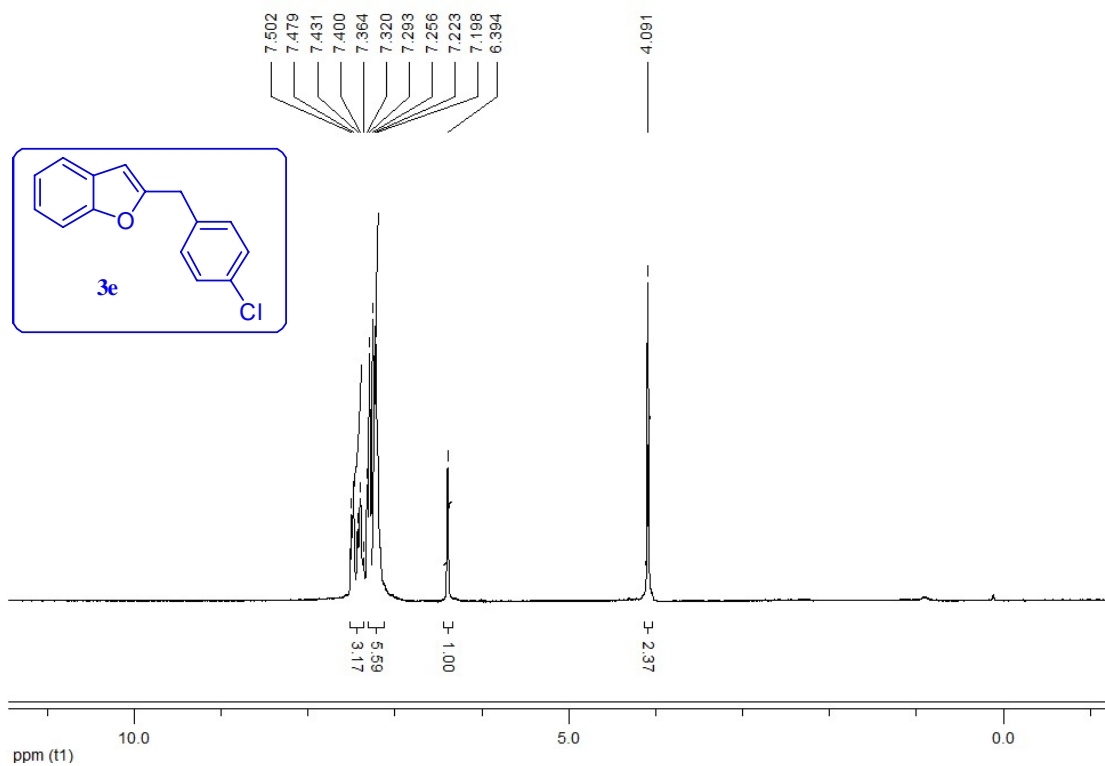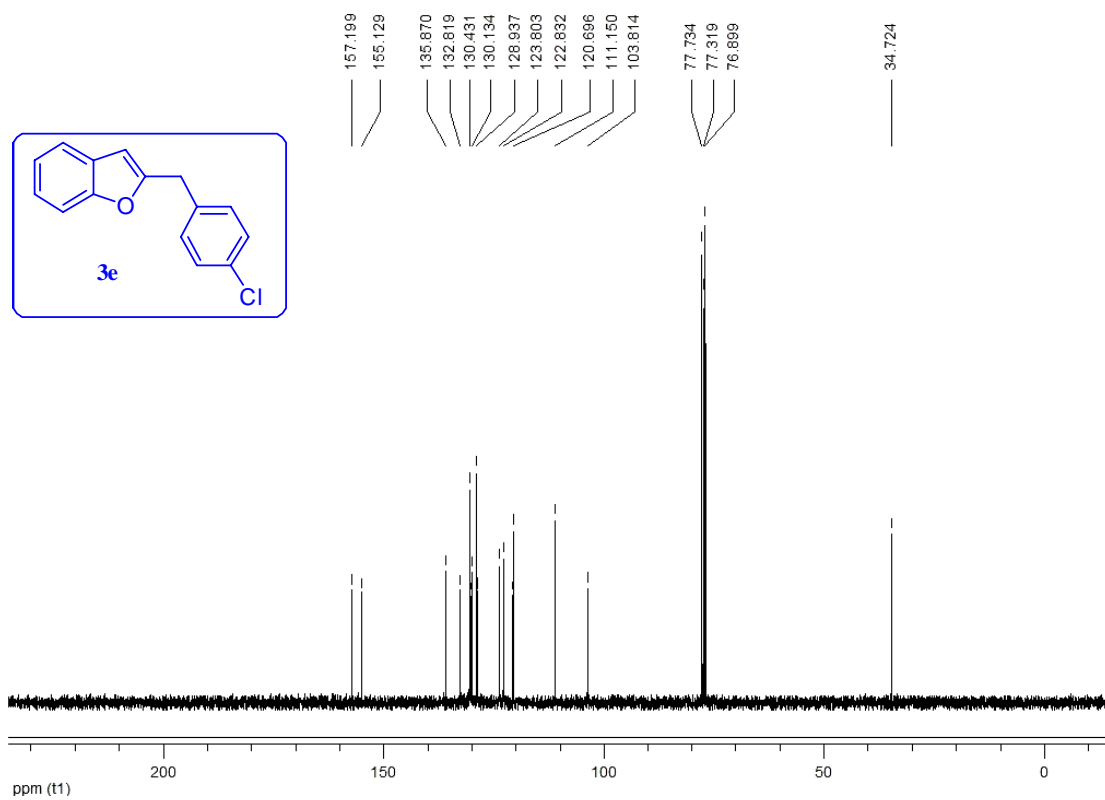

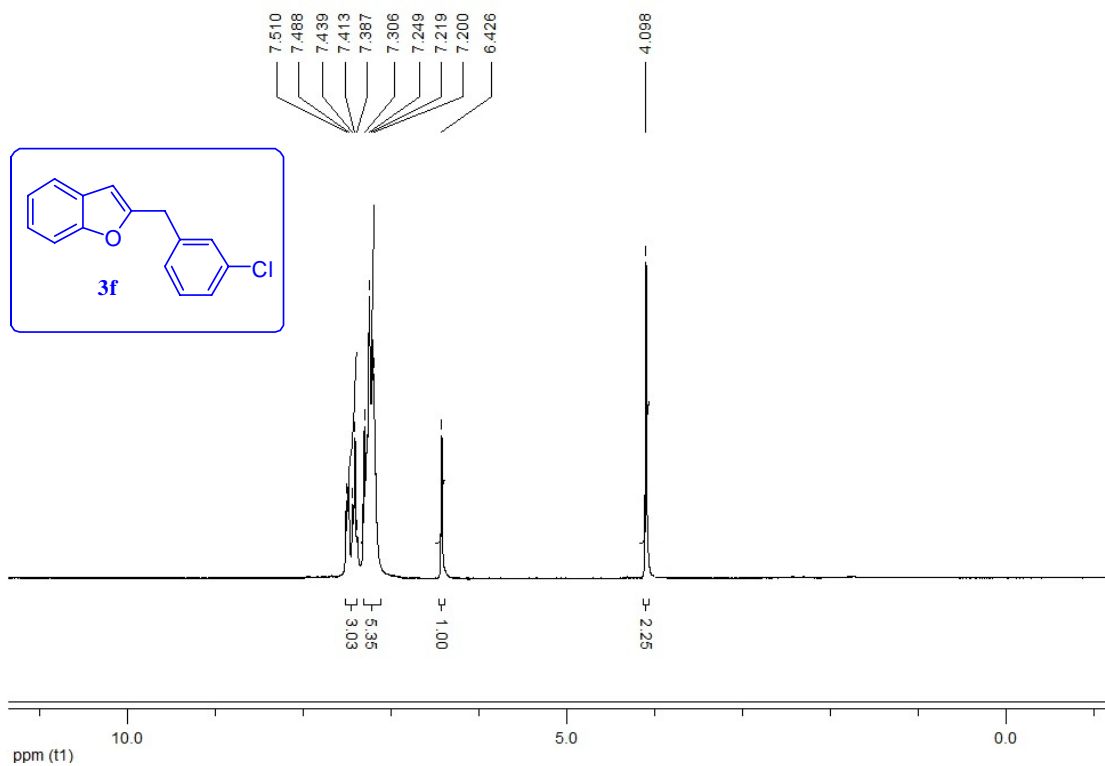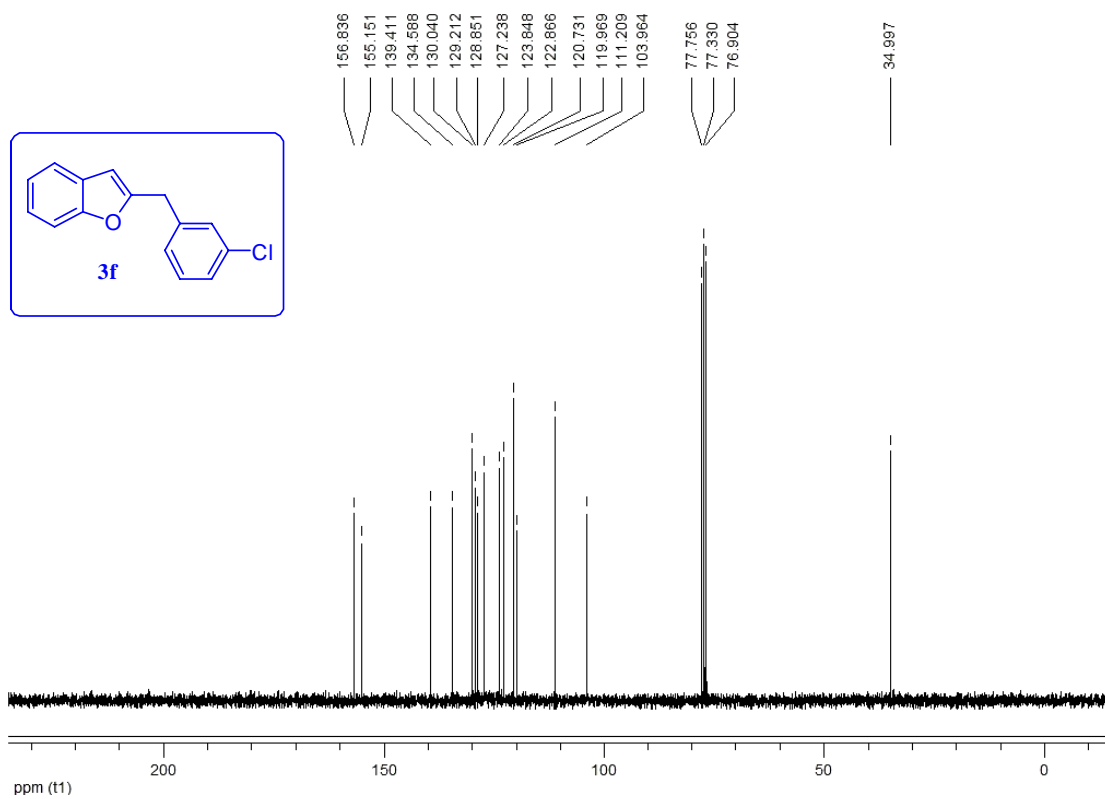

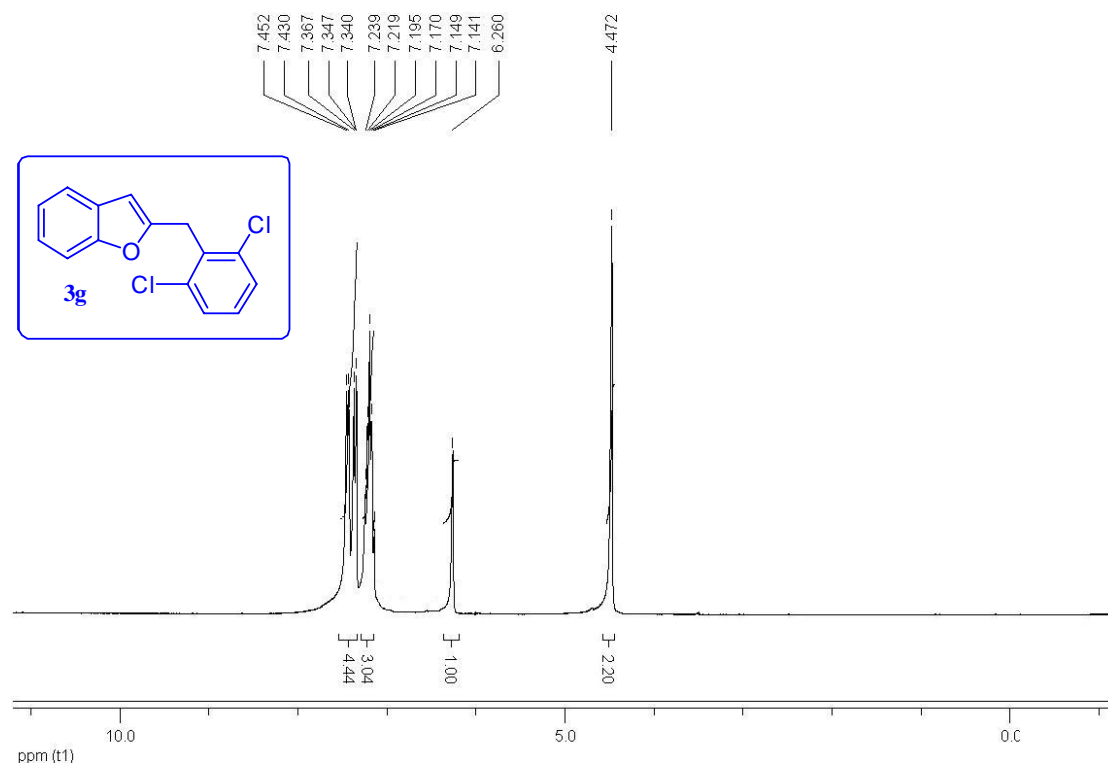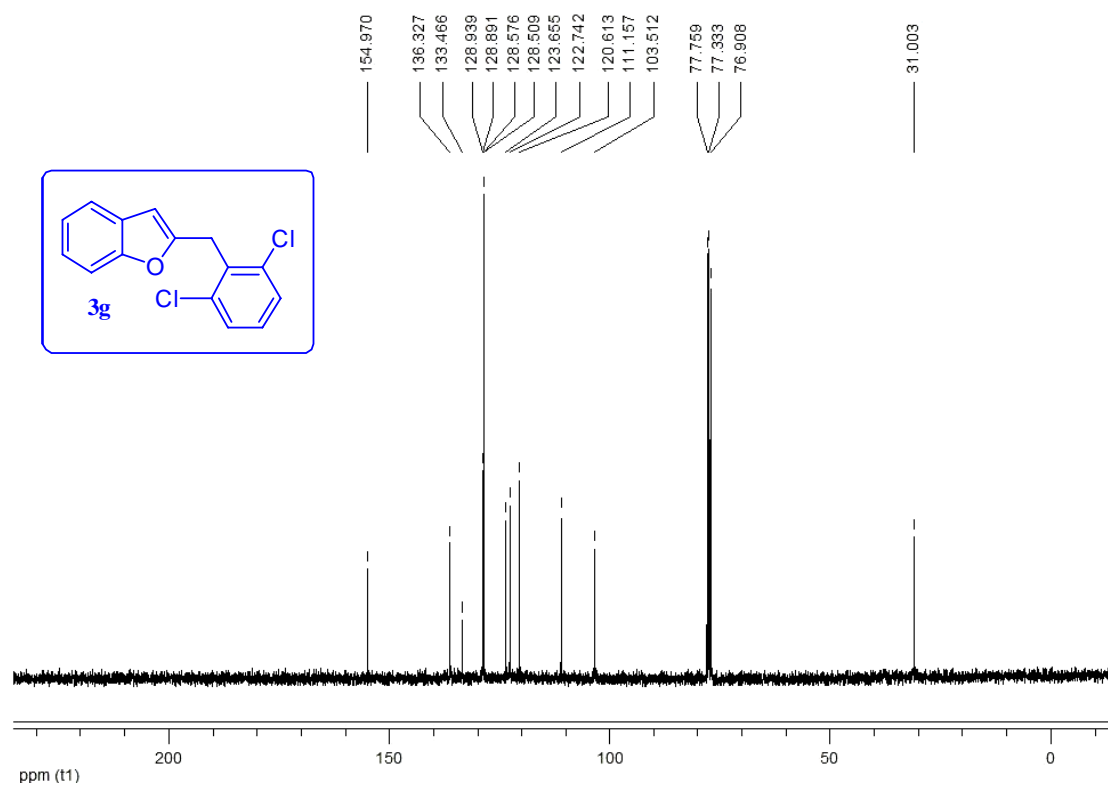

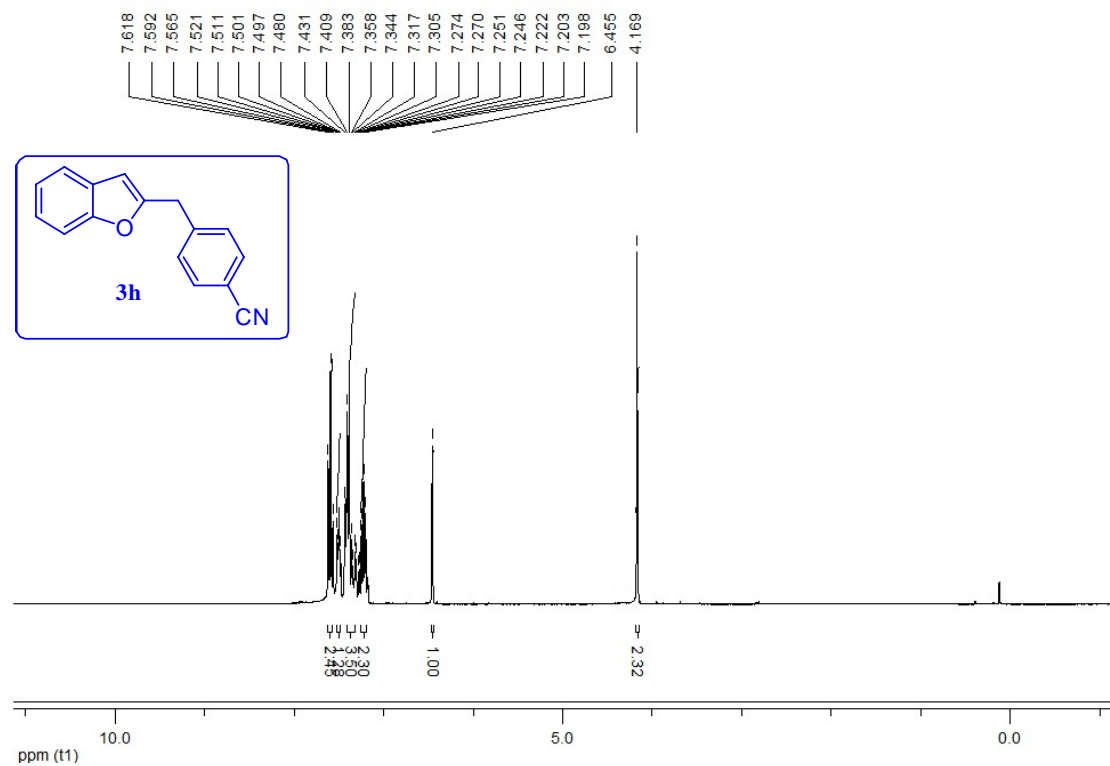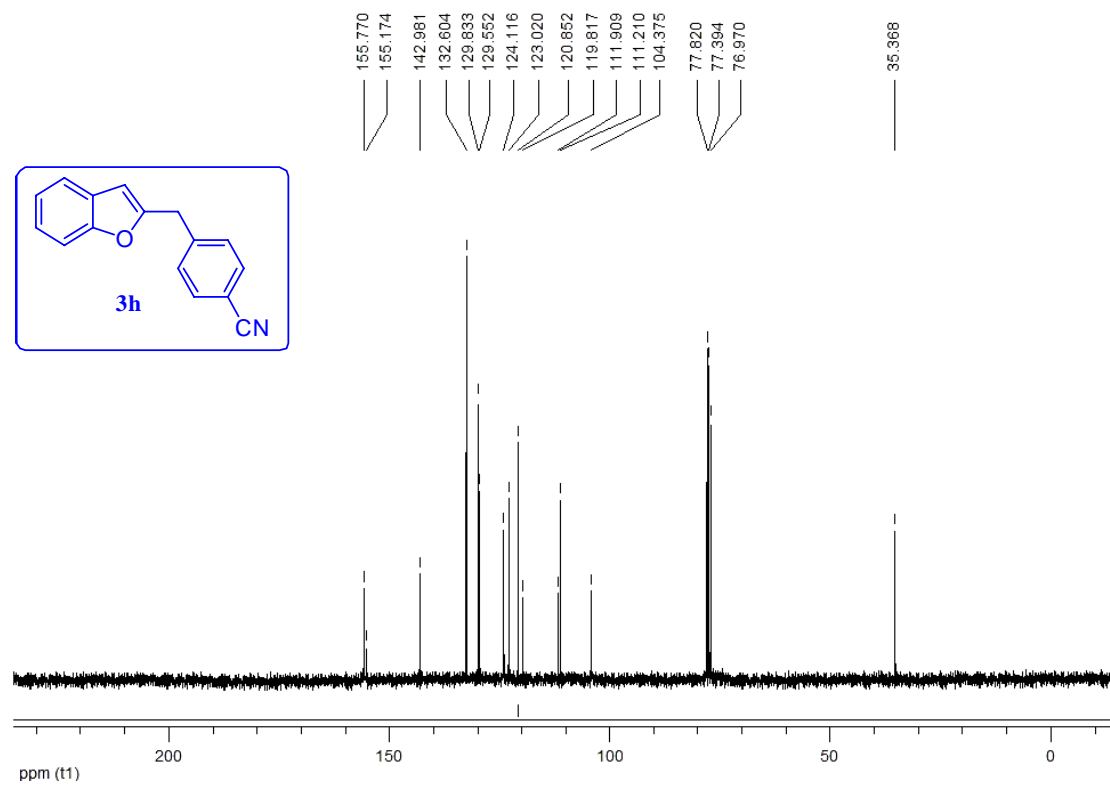

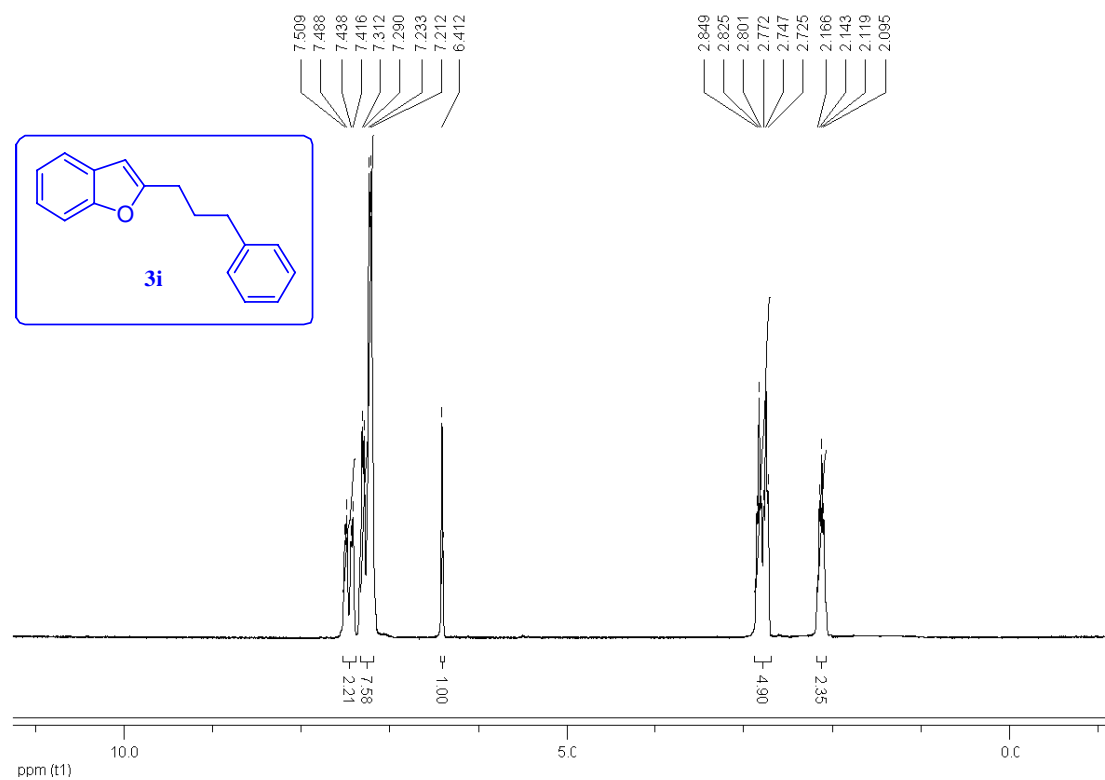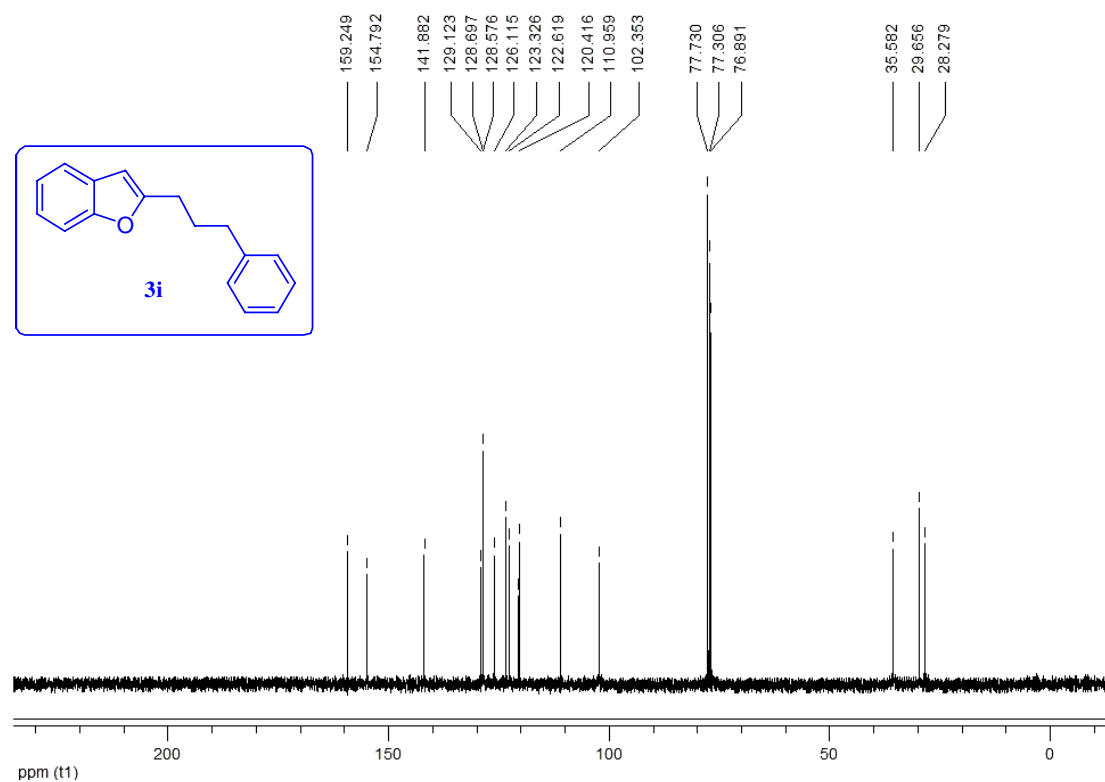

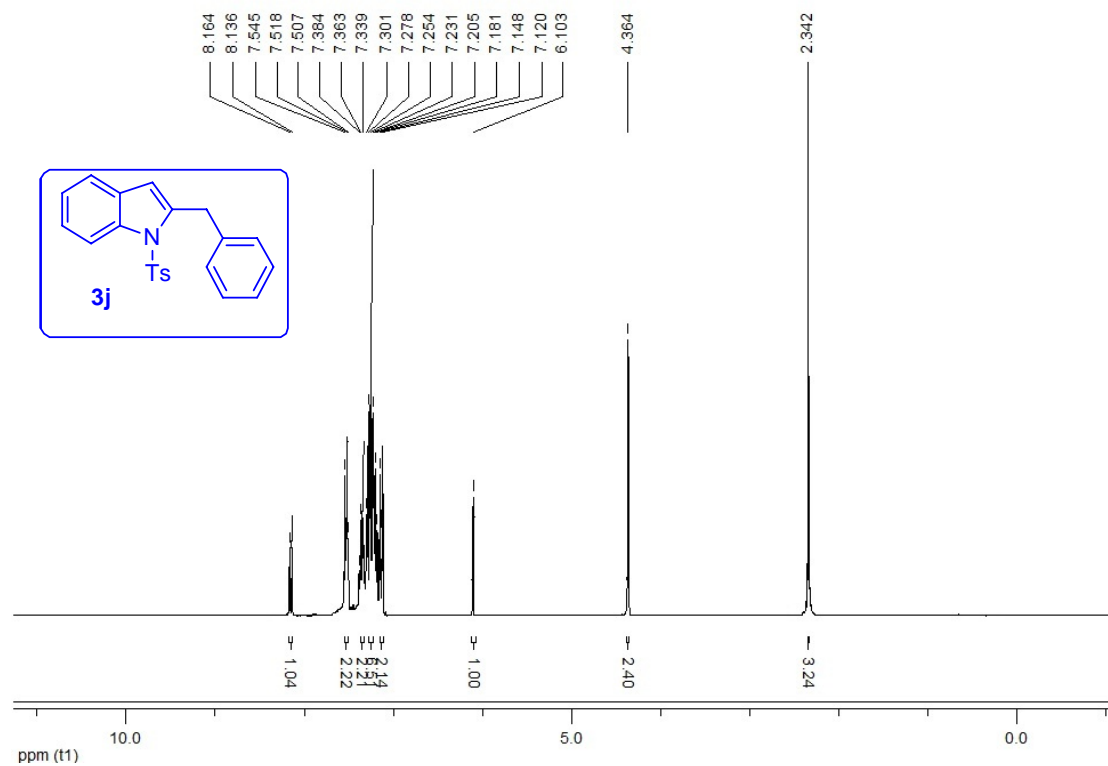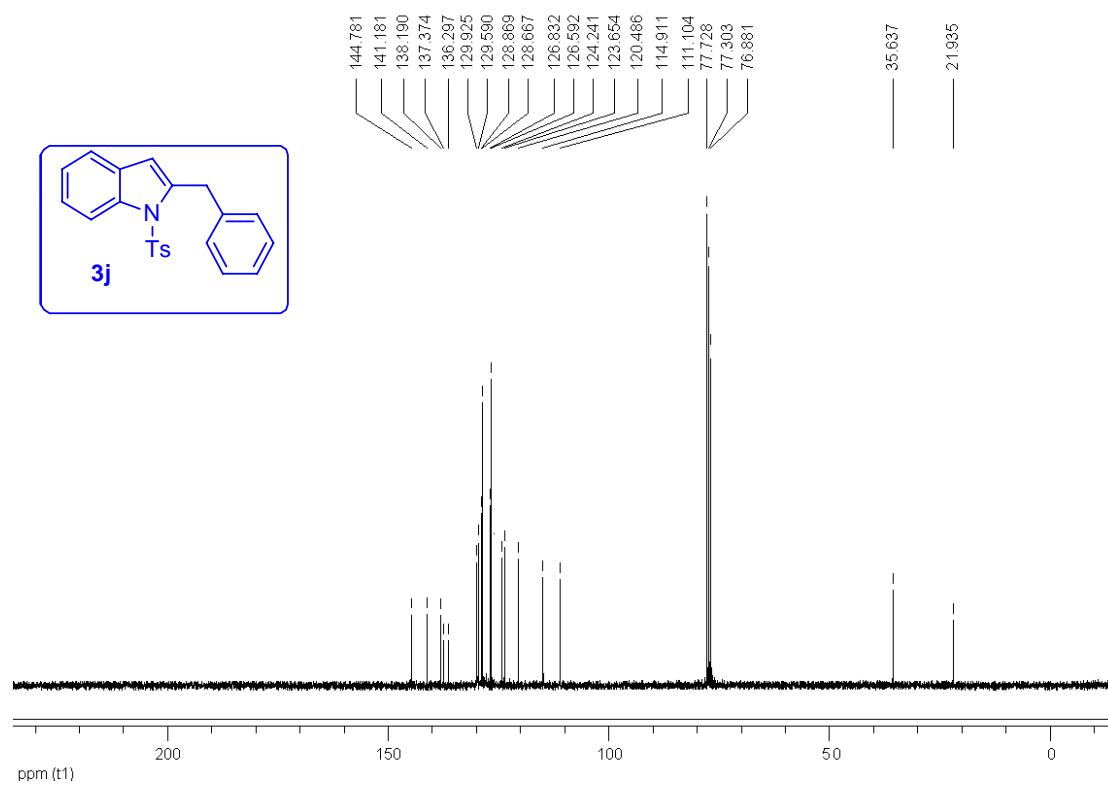

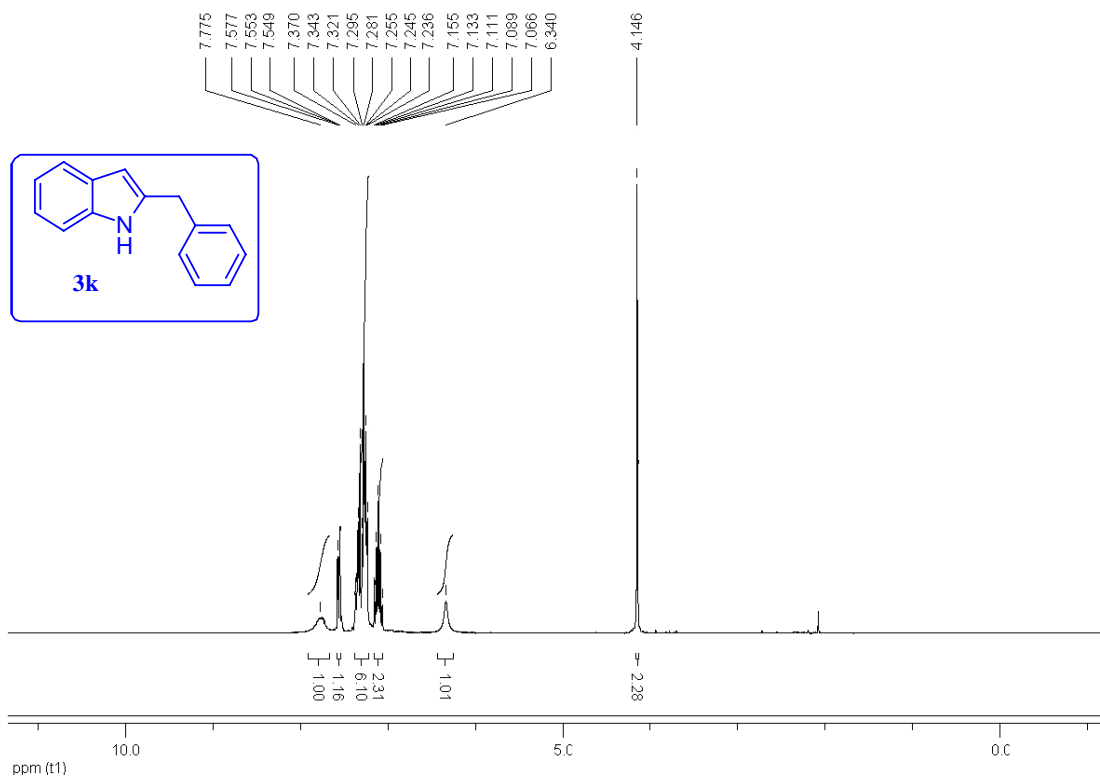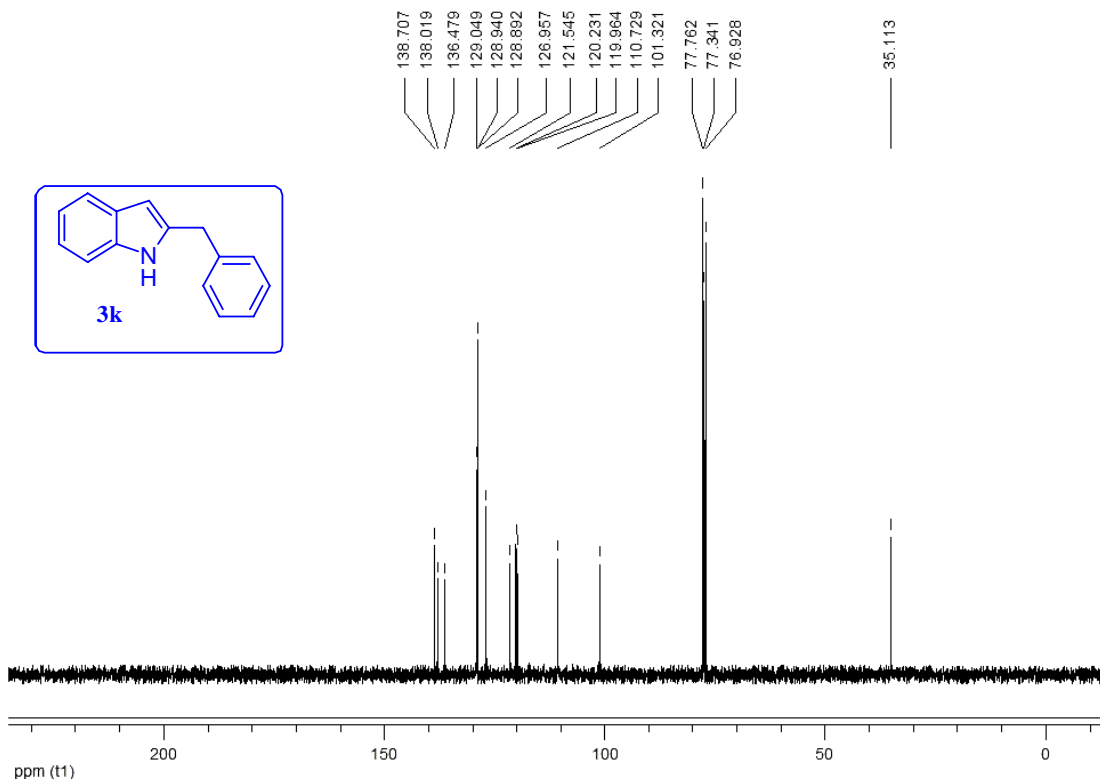



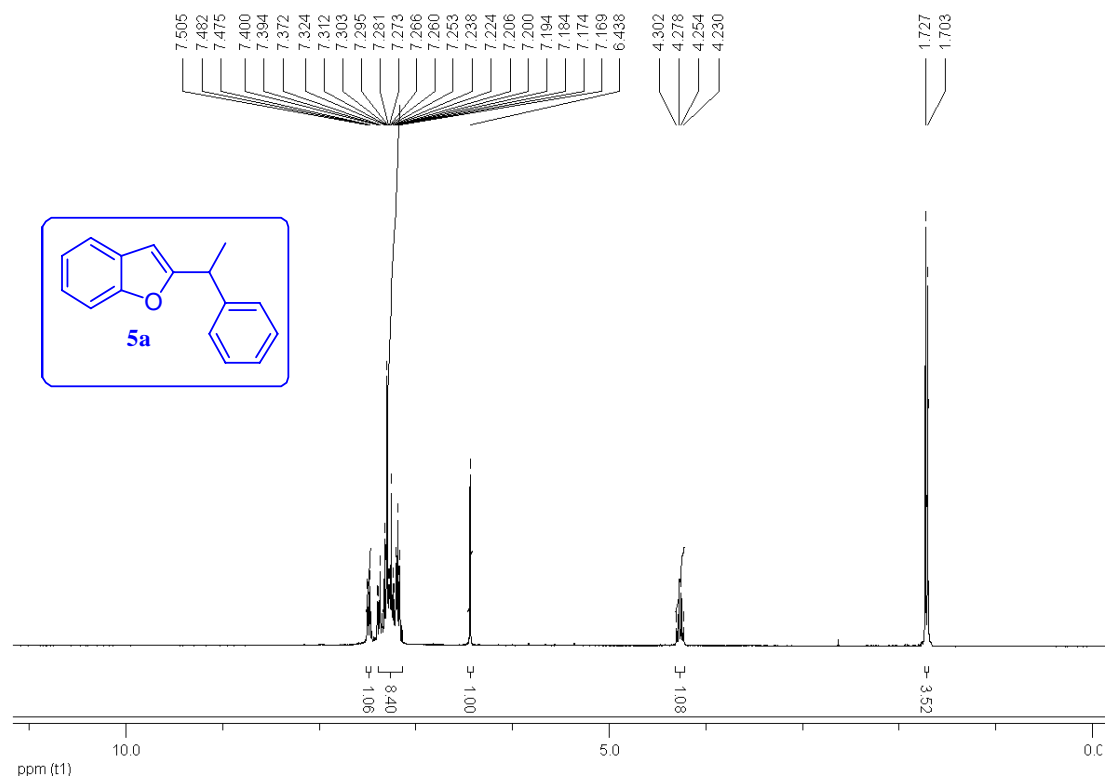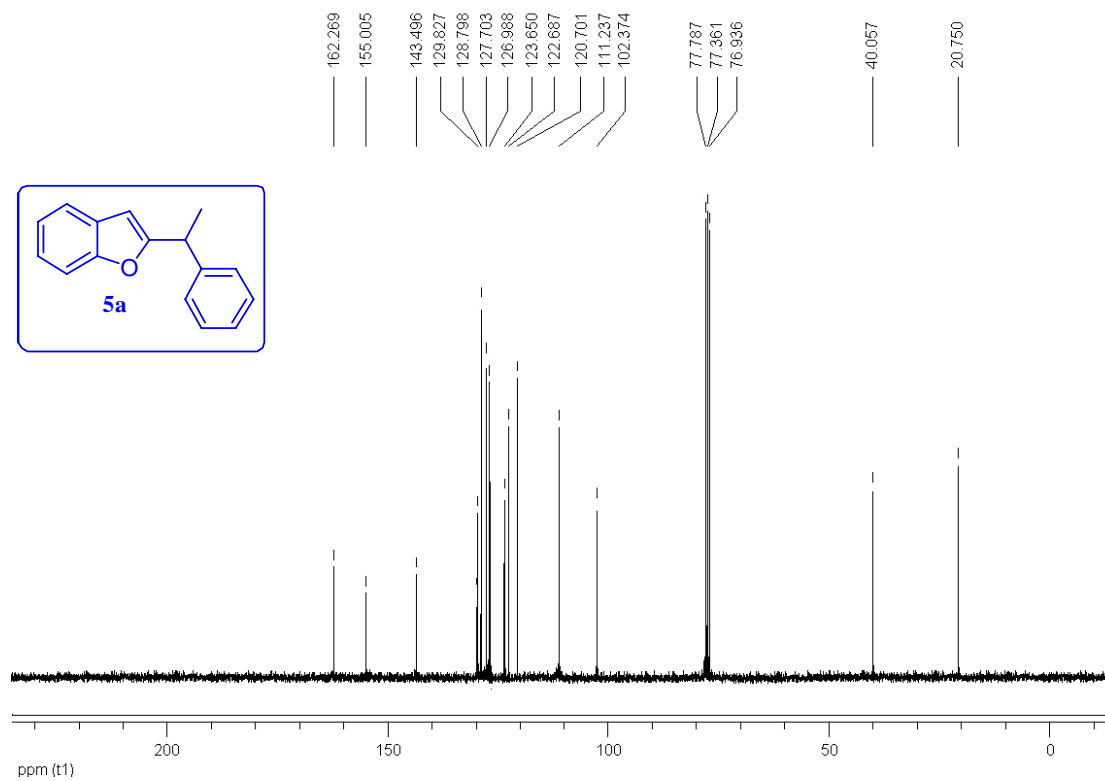

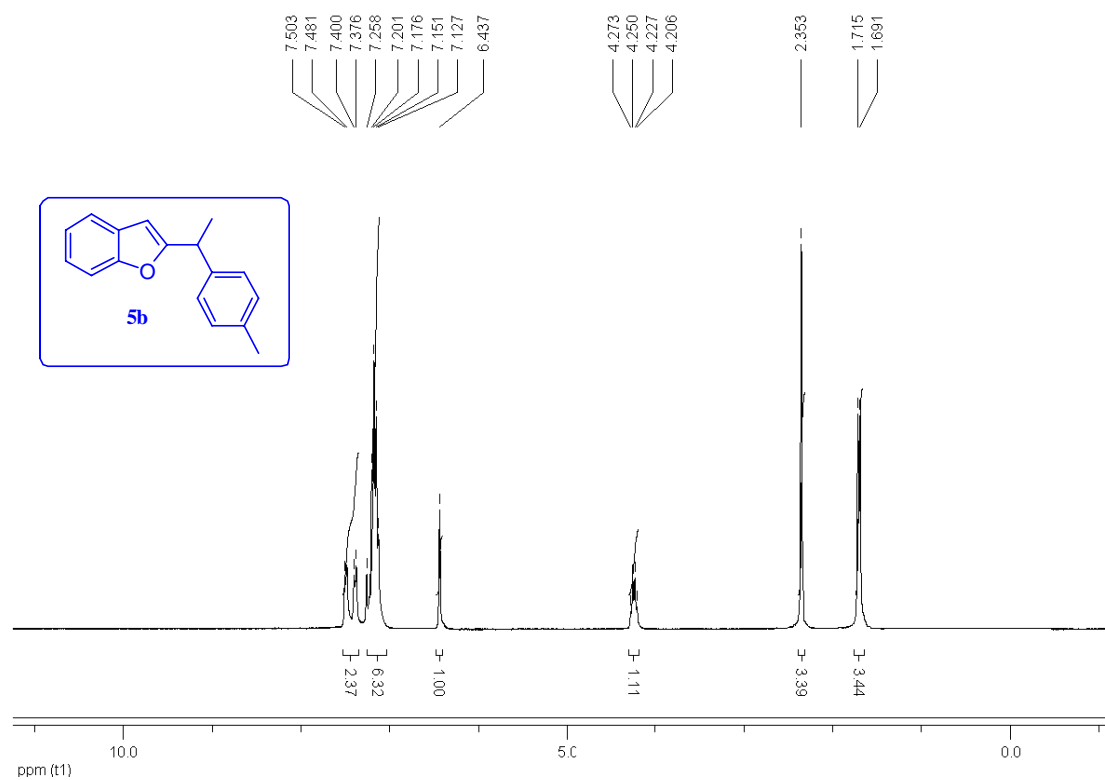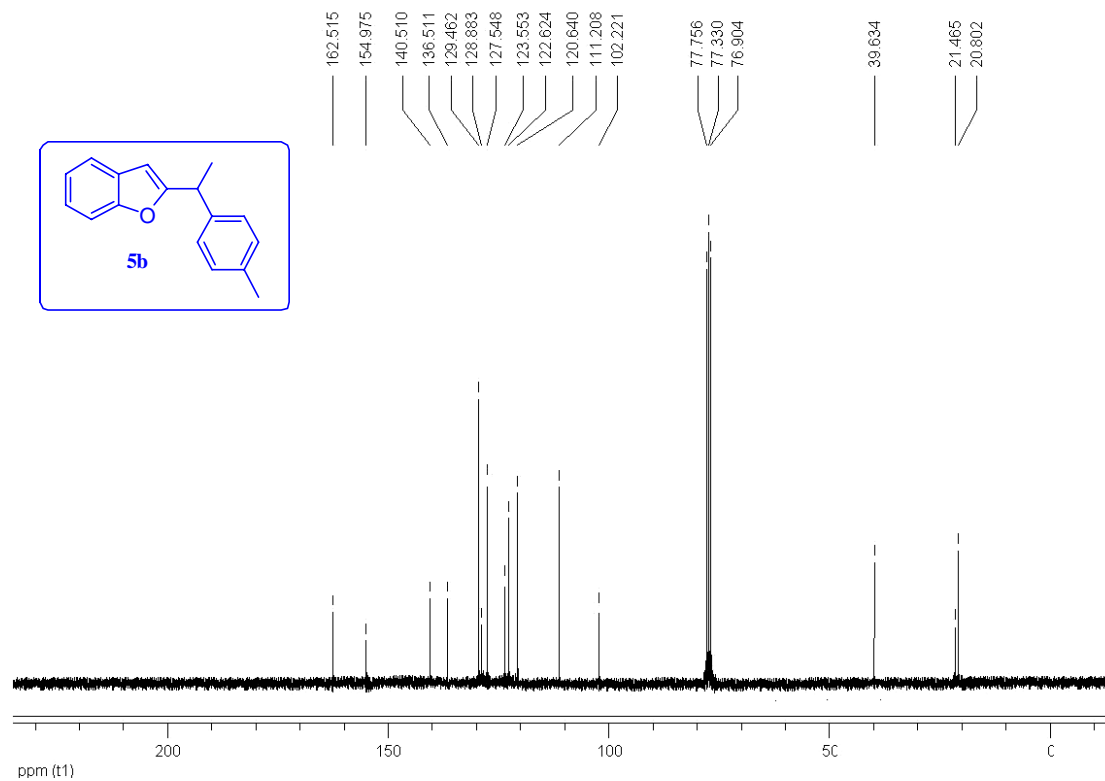

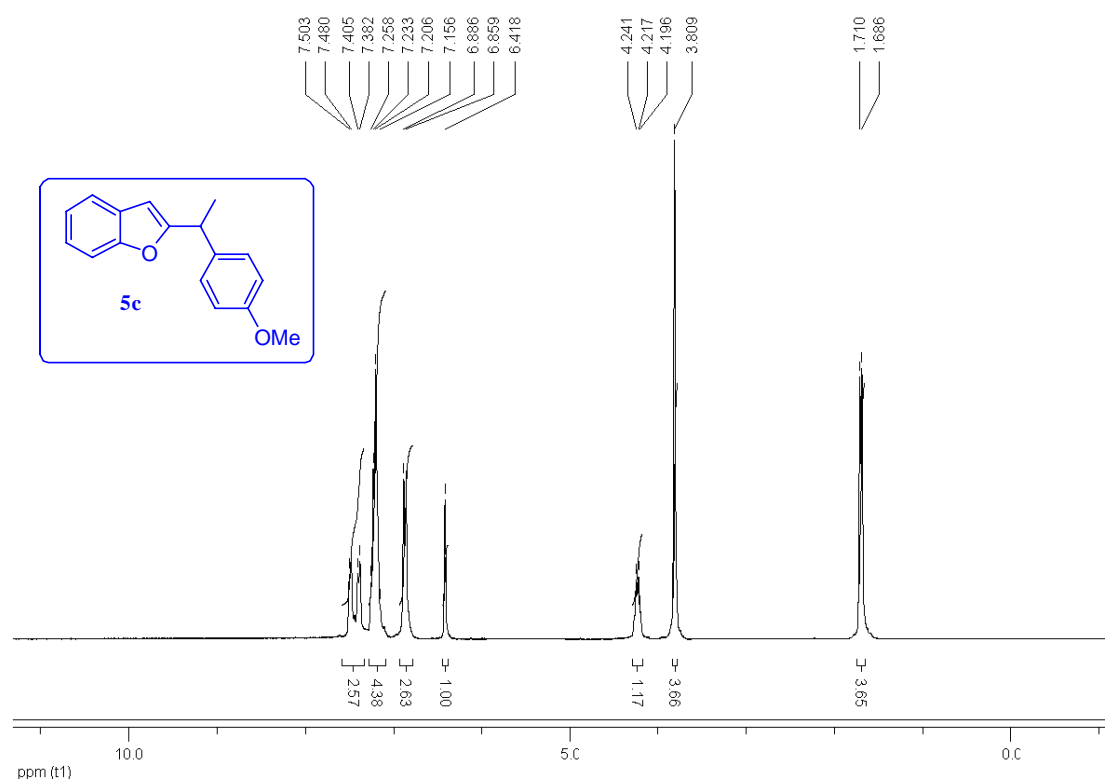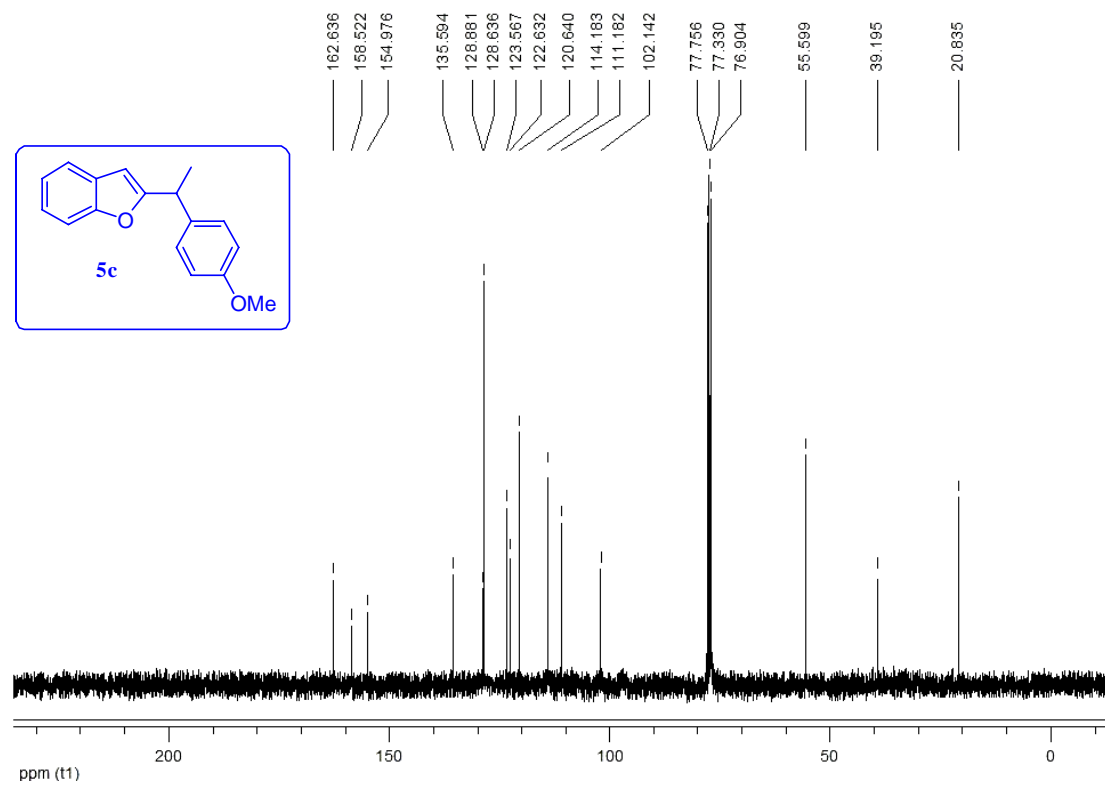

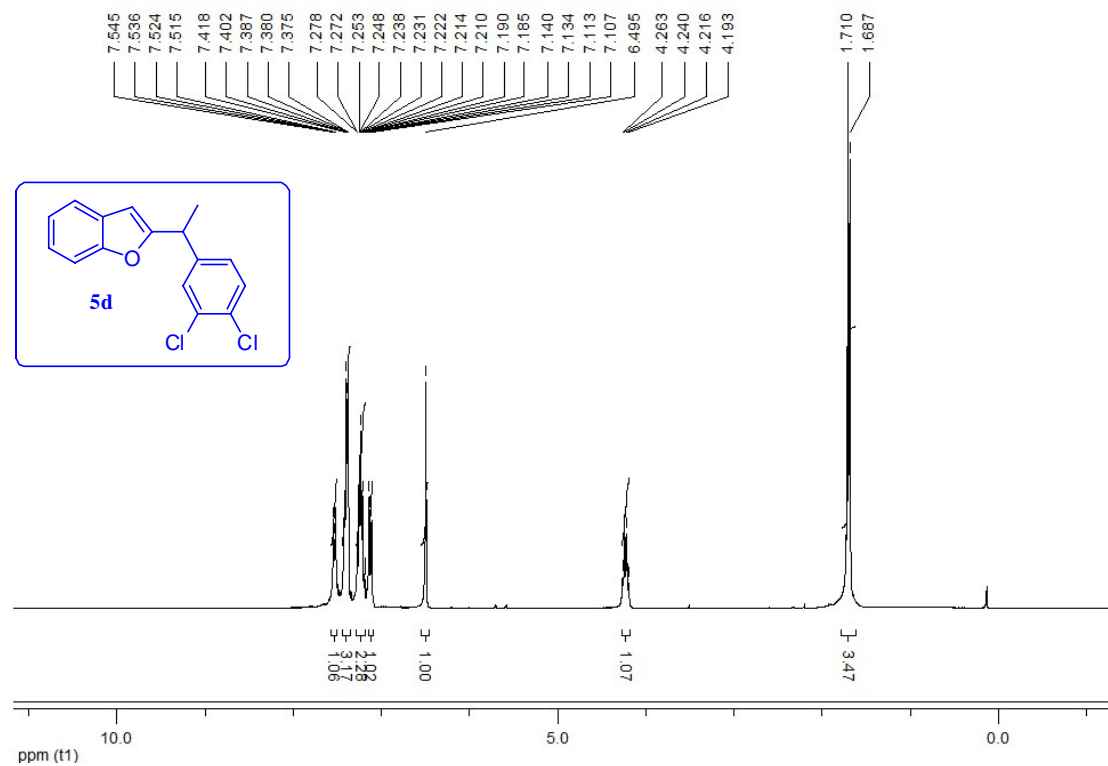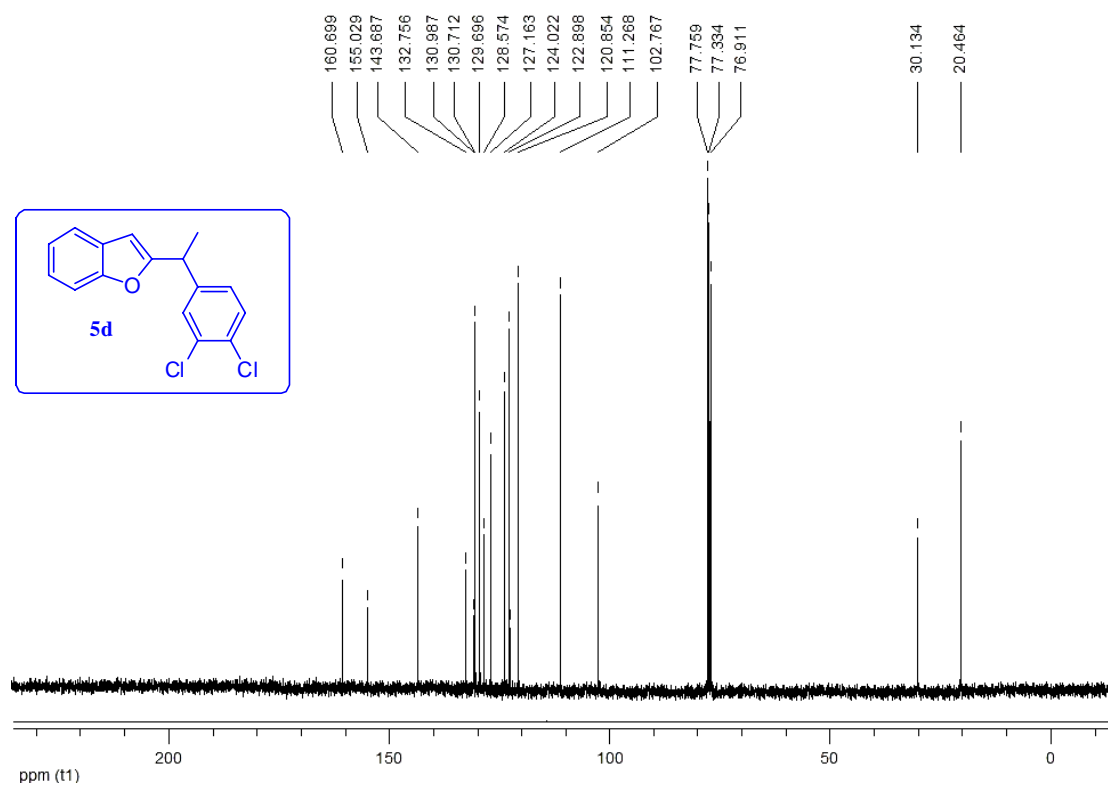

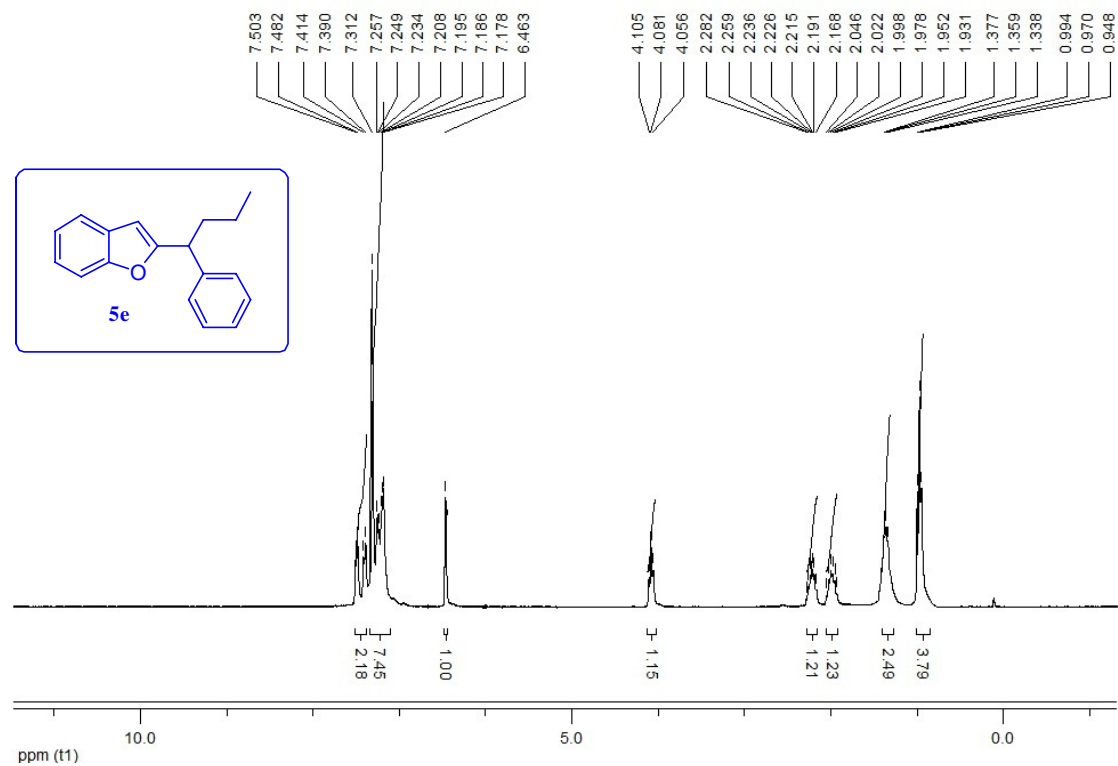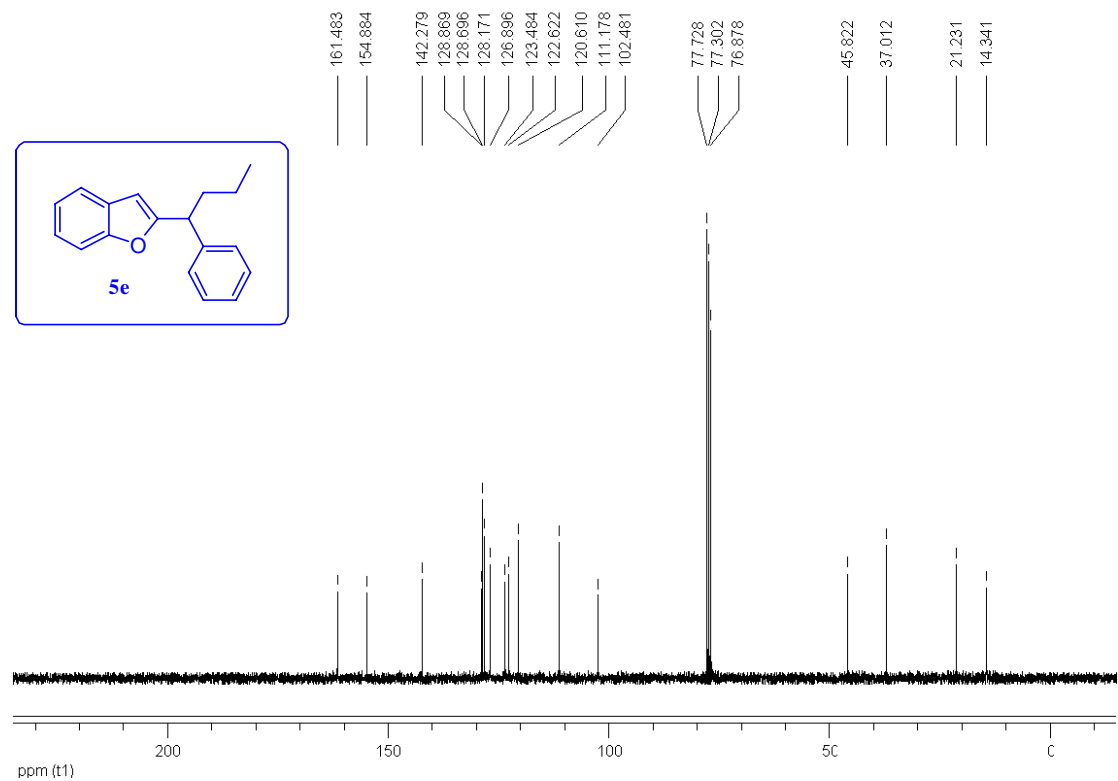

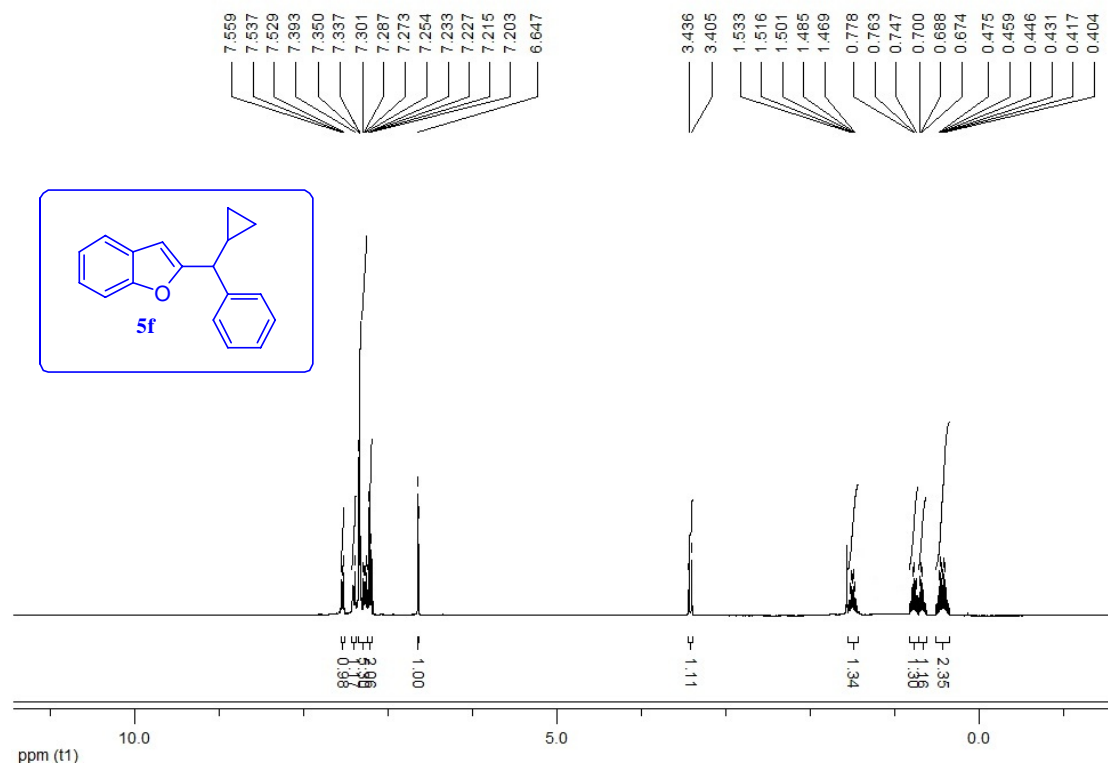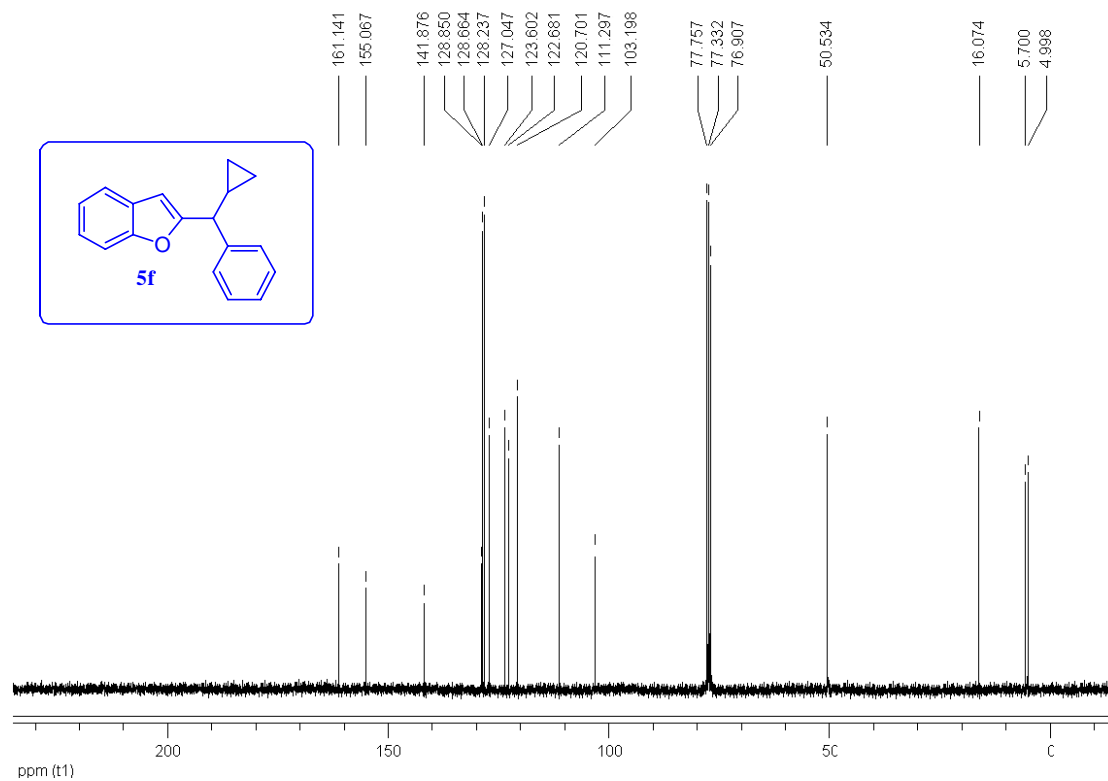

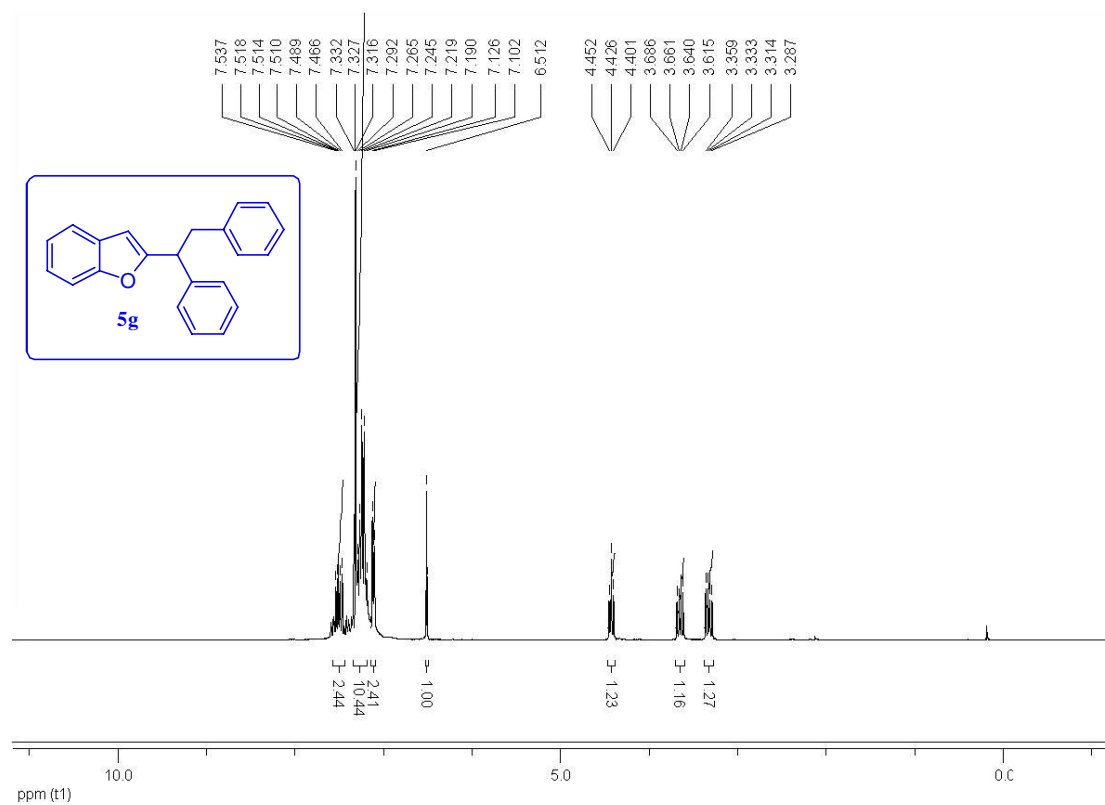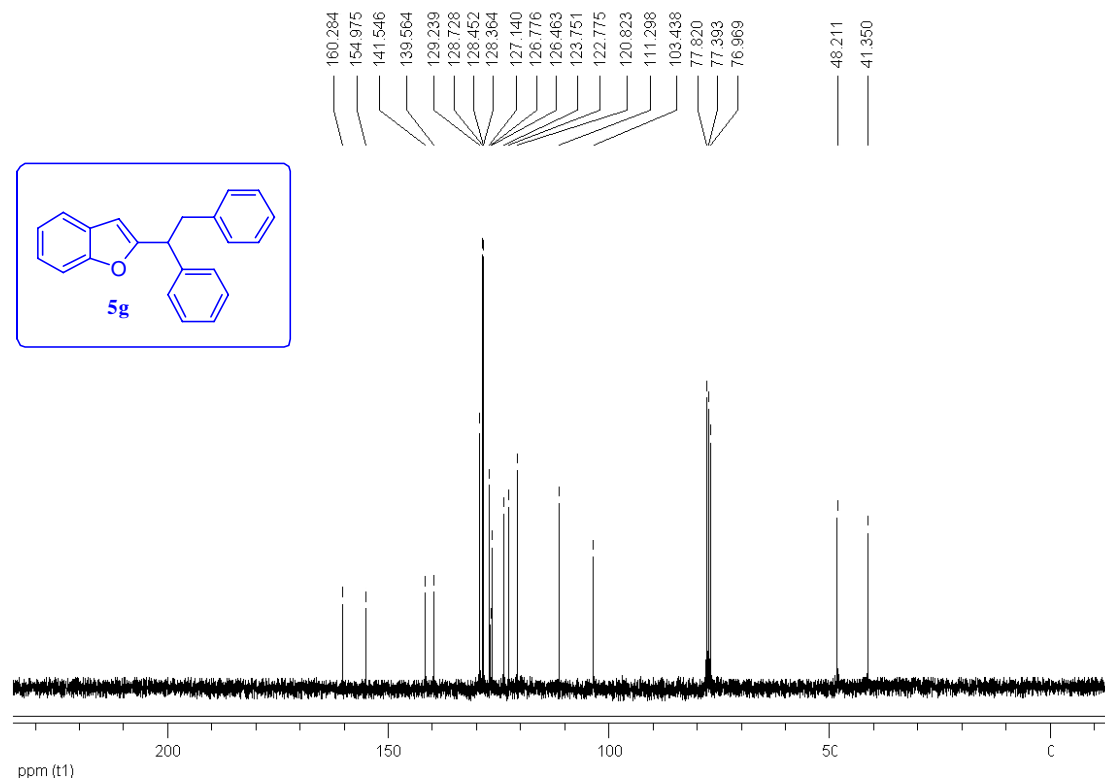

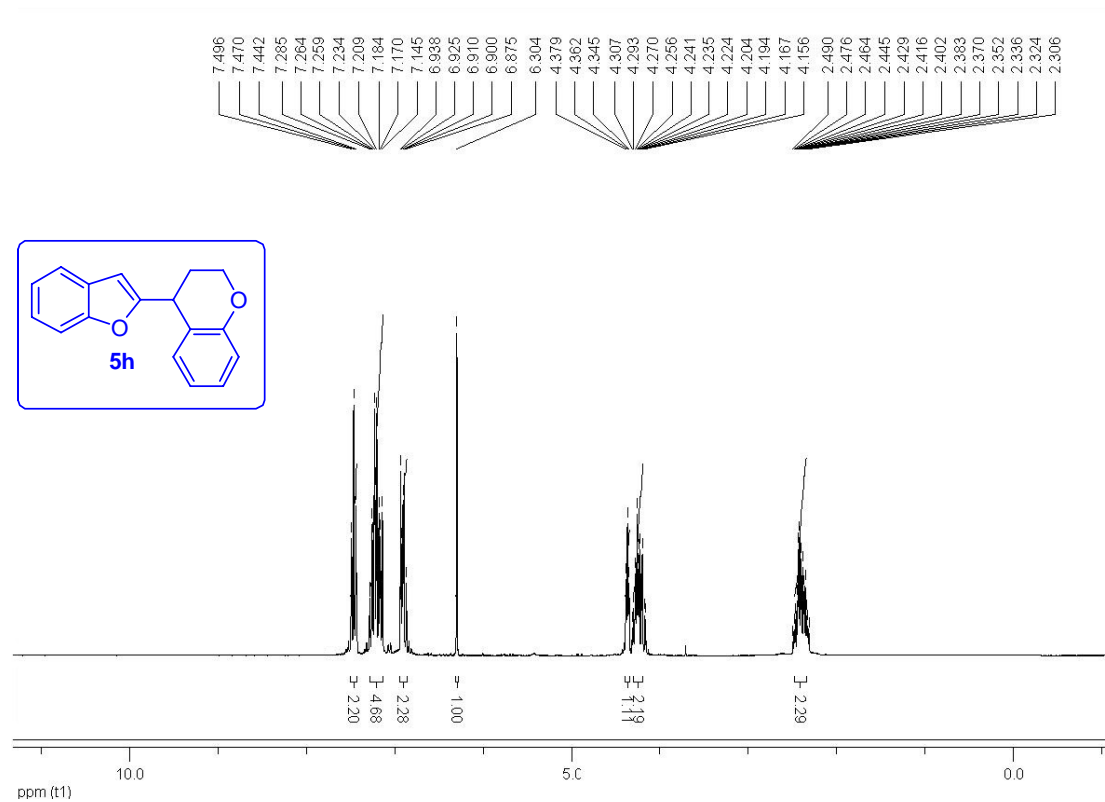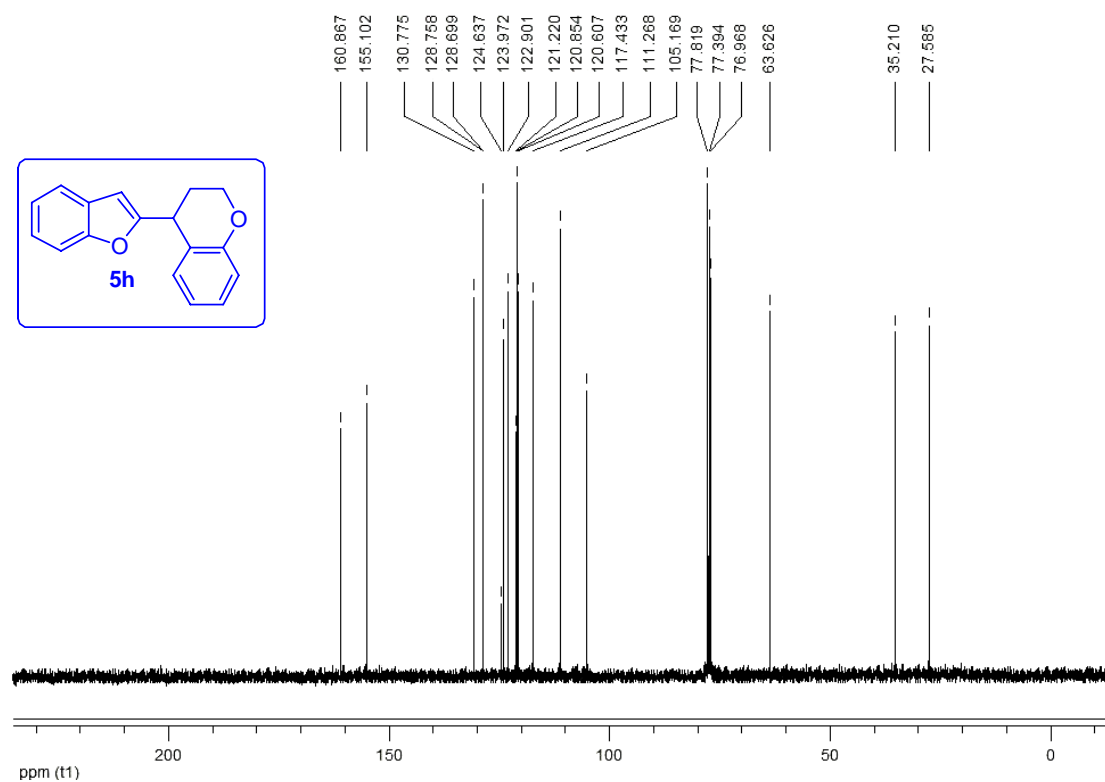



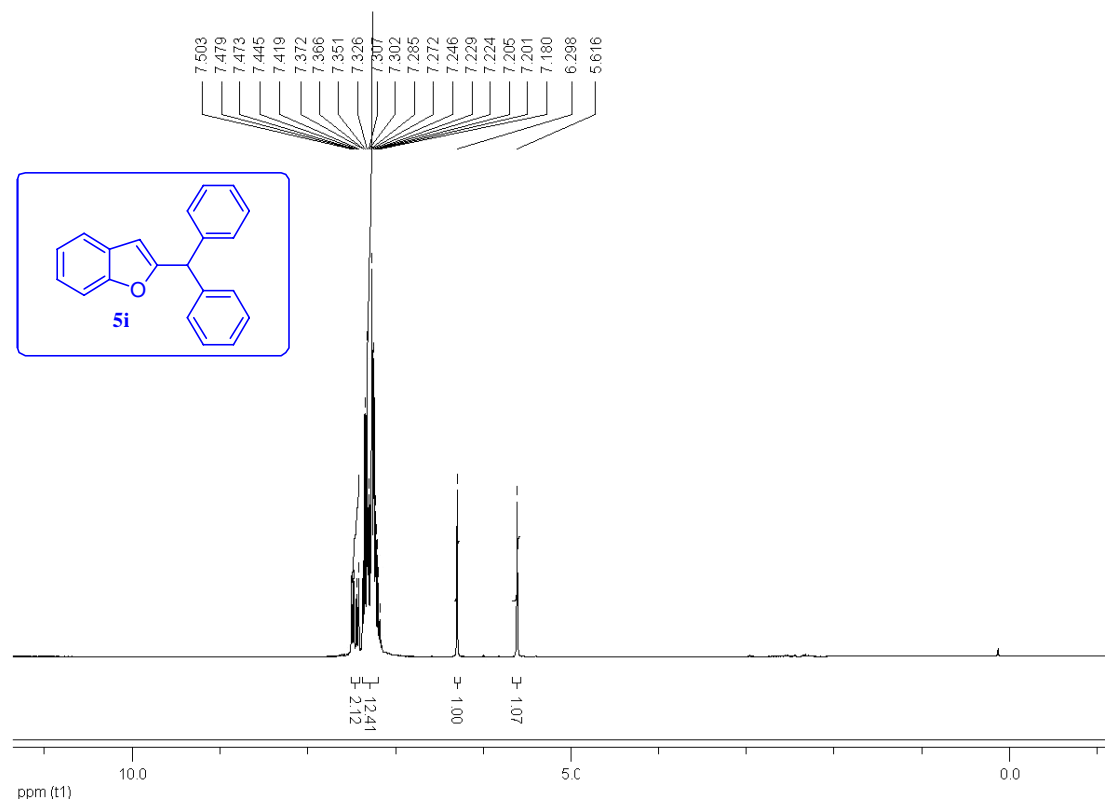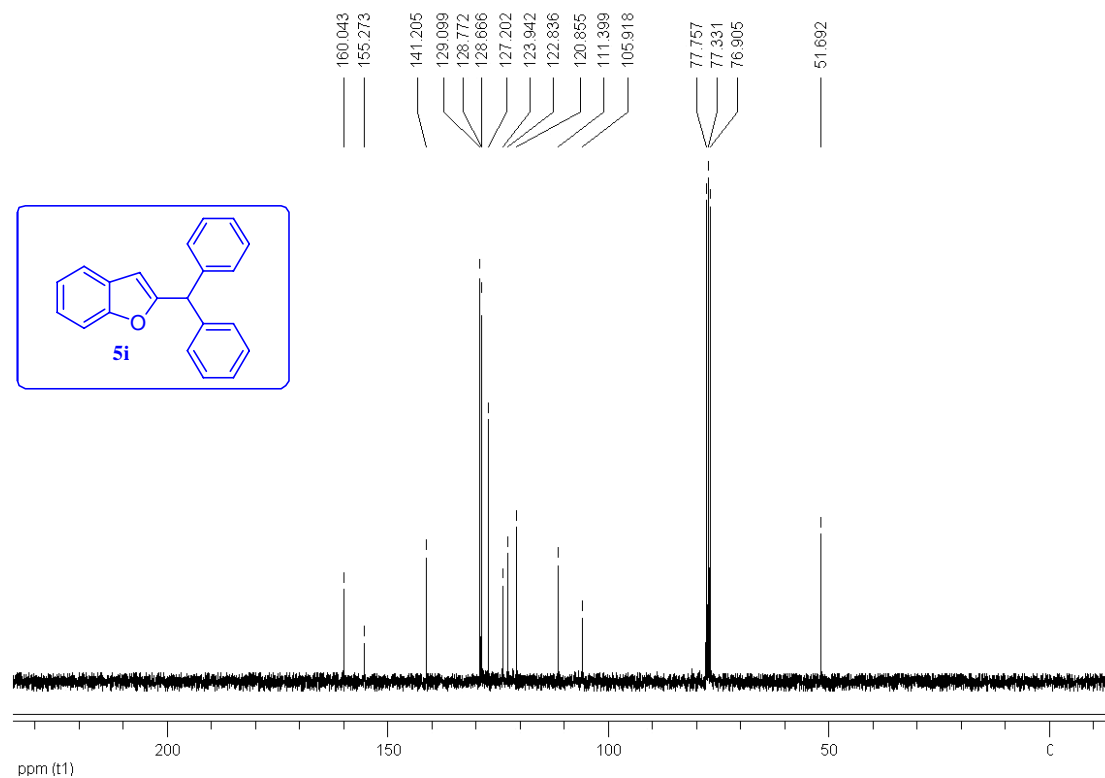

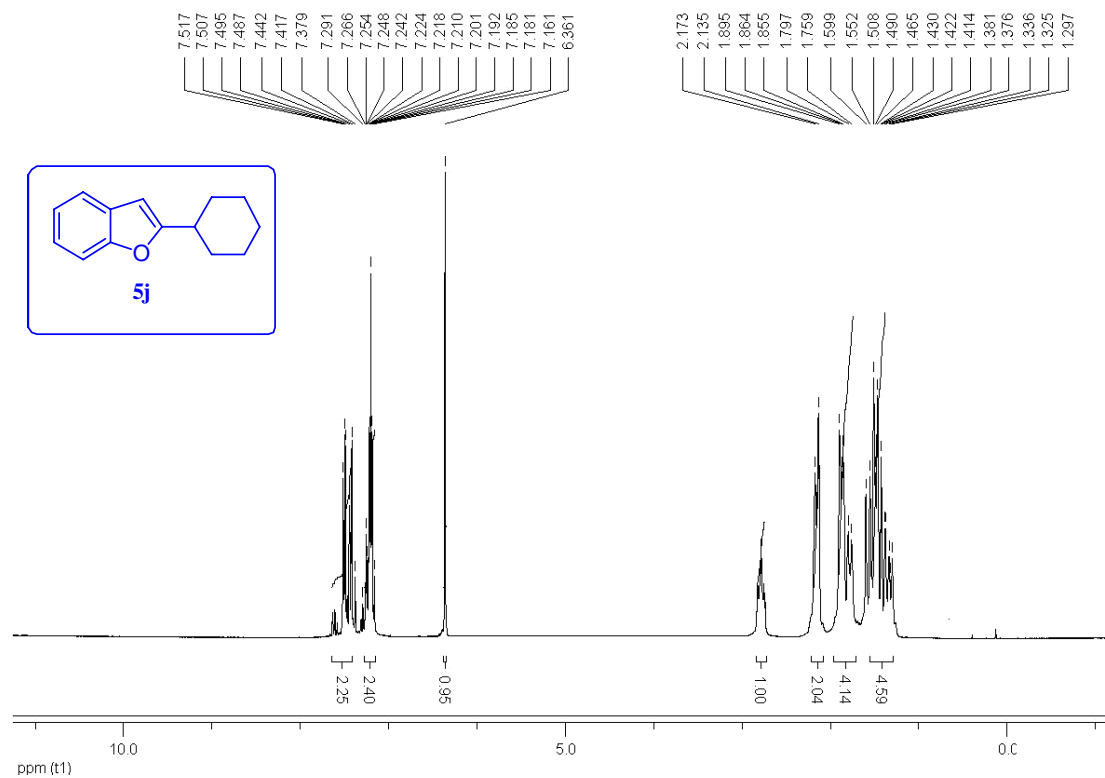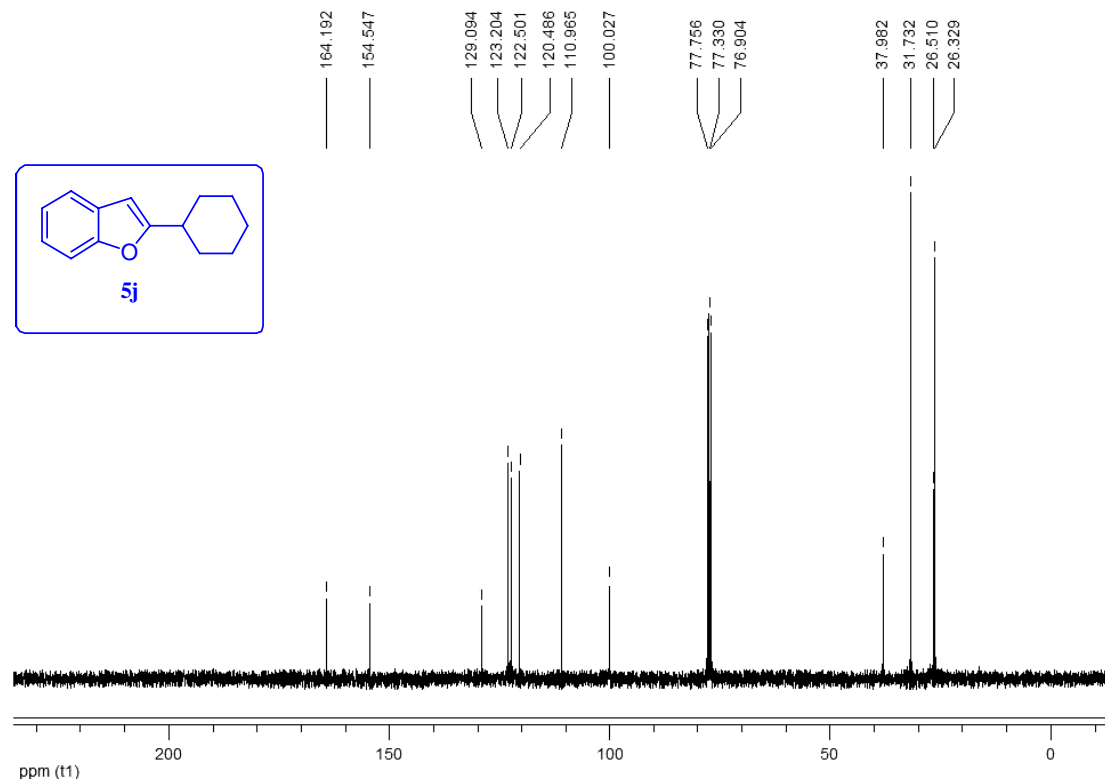

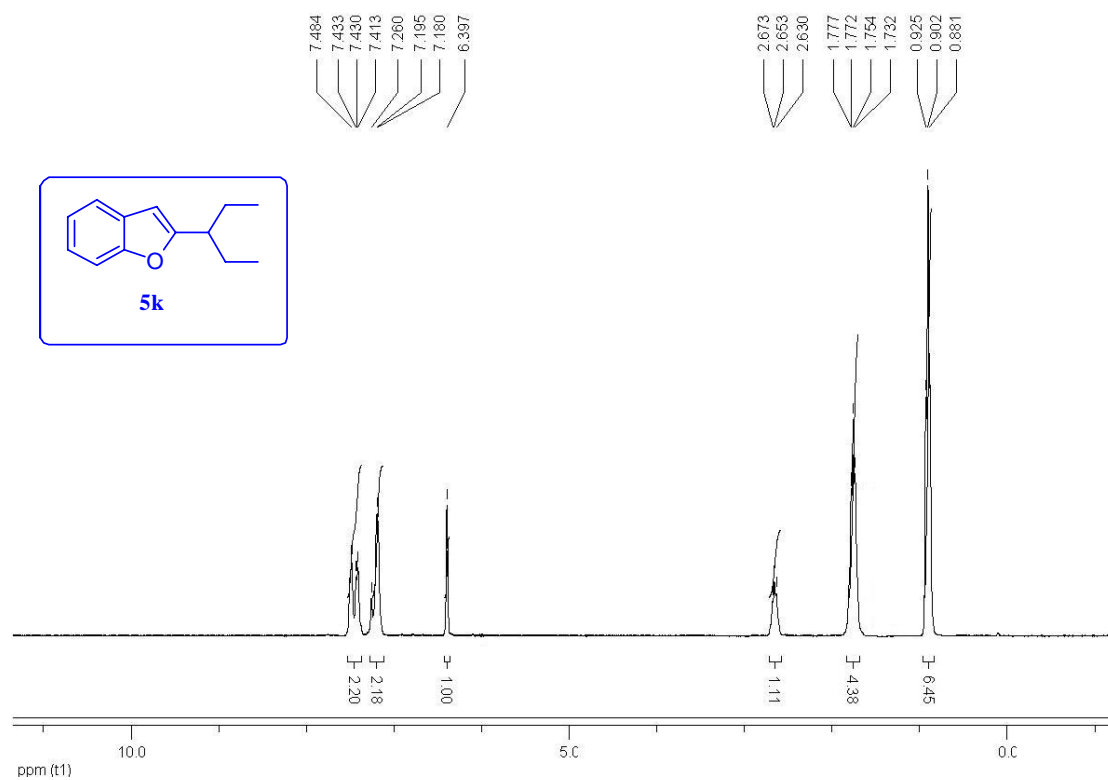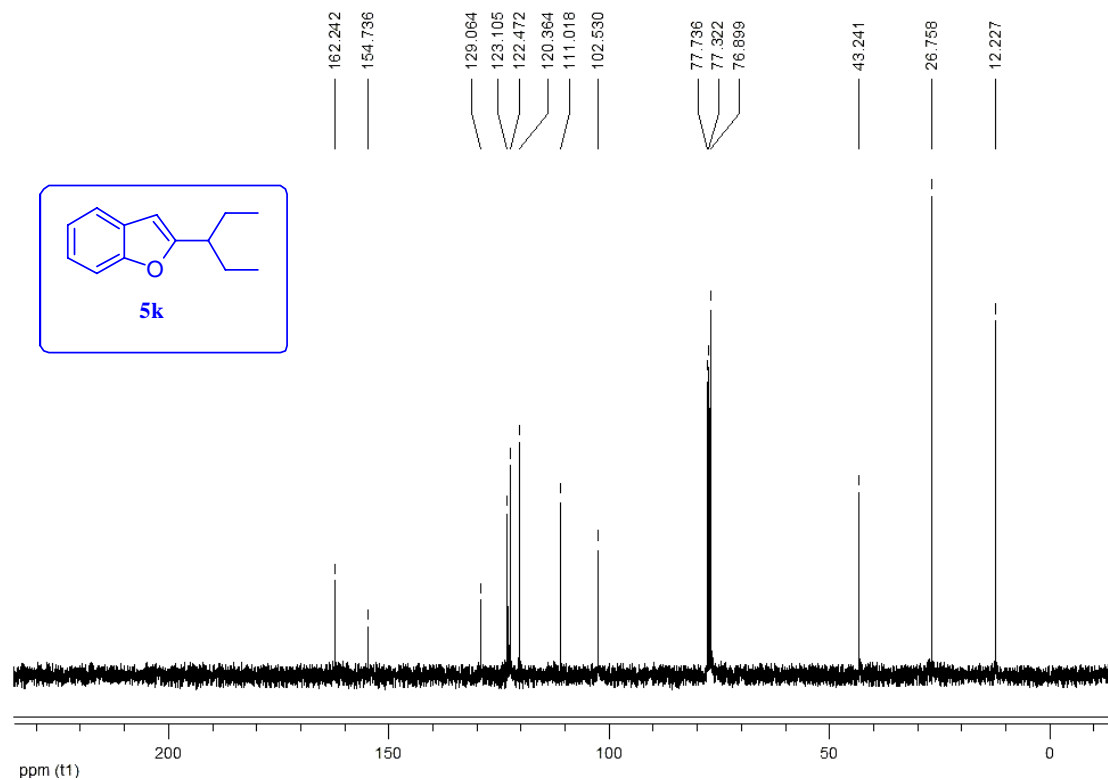

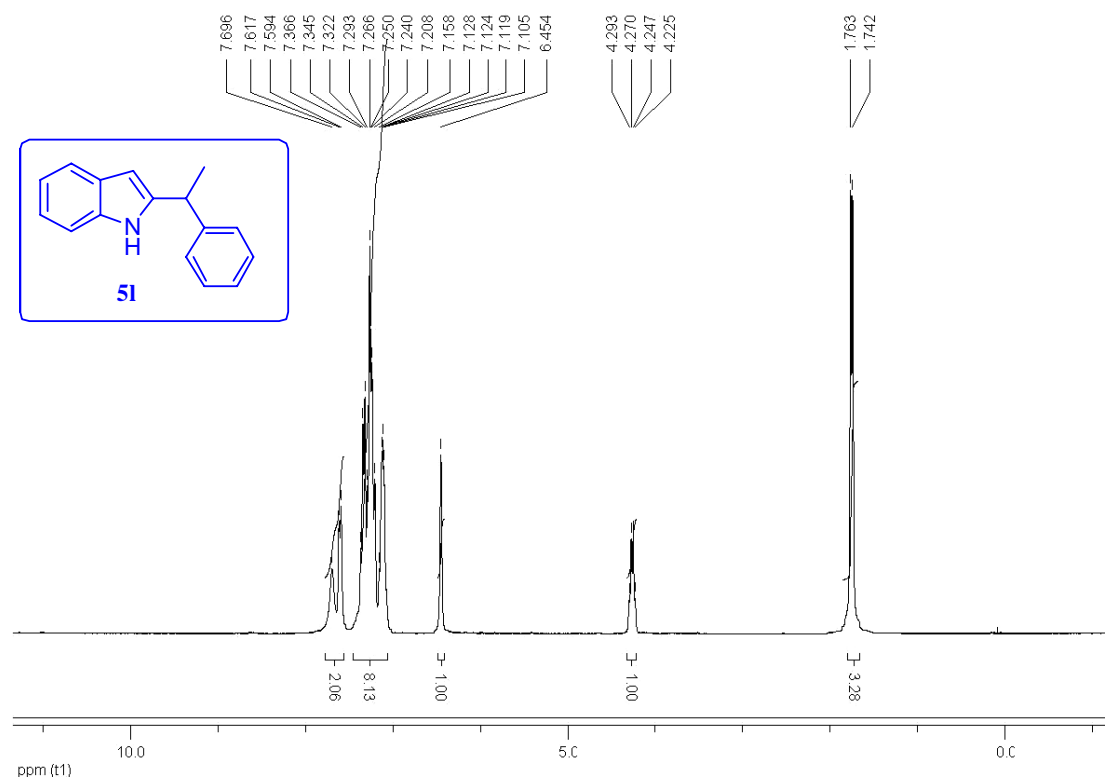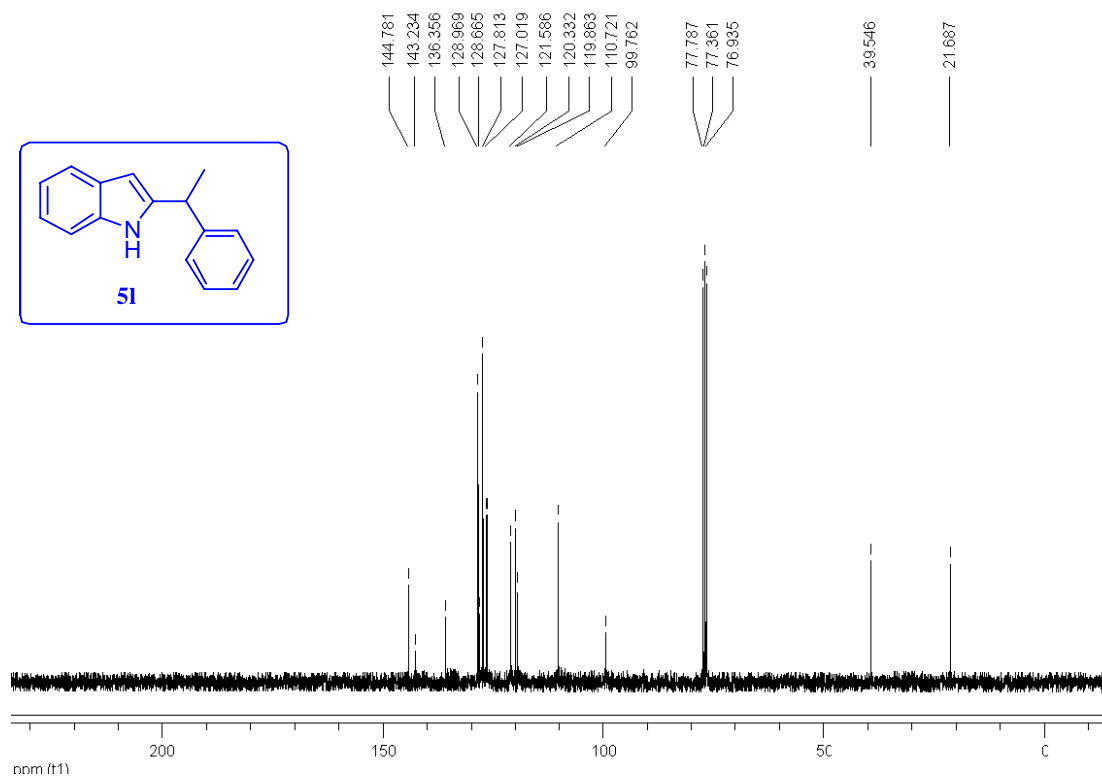

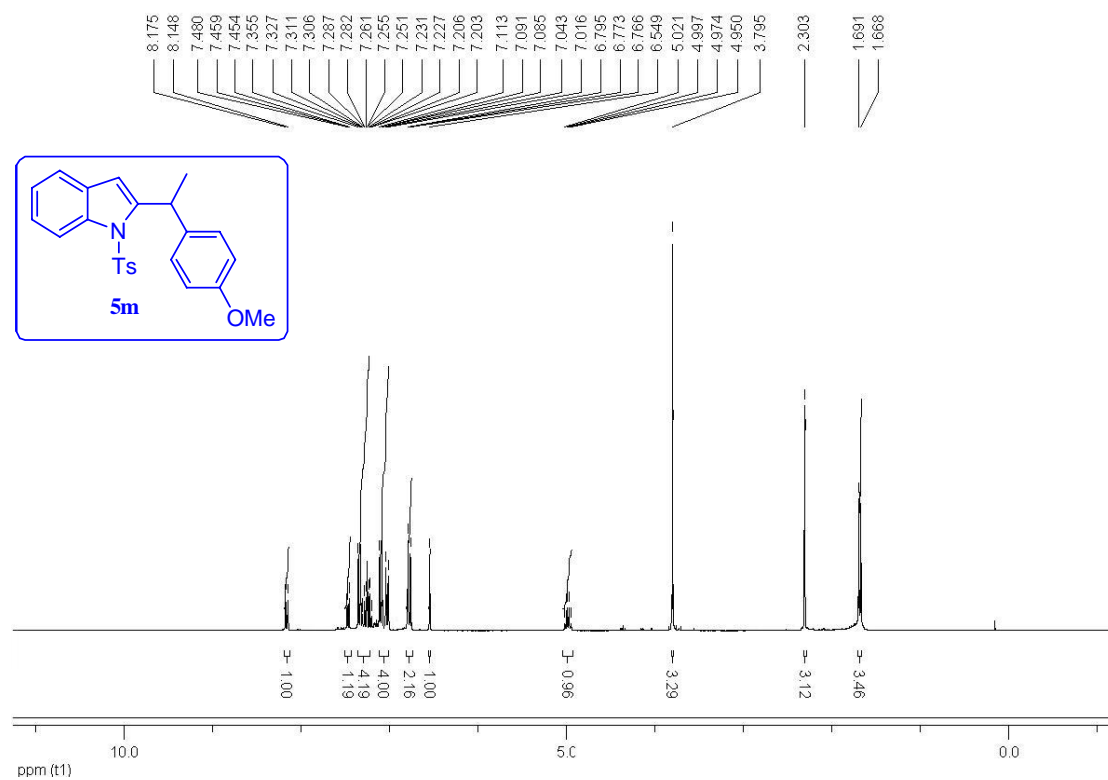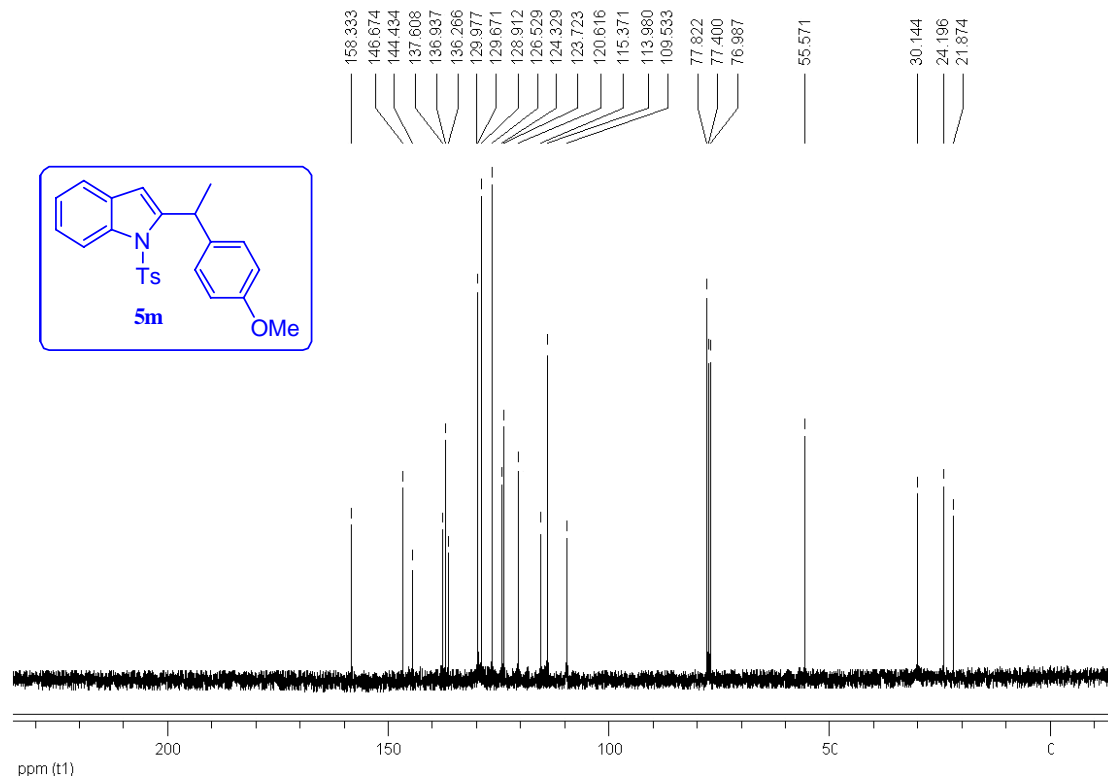

Supplement: c2ob26867a.pdf [file c2ob26867a.pdf]
